# Supplementary material for: Circulating miR-320b Contributes to CD4+ T-Cell Proliferation in Systemic Lupus Erythematosus via MAP3K1
Source: J Immunol Res. 2023 Oct 26;2023:6696967. doi: 10.1155/2023/6696967 (PMC10622187; doi:10.1155/2023/6696967)
Supplement: Supplementary 2 — Total miRNA expressions detected in the small RNA sequencing analysis of pre- and post-MSCT group. [file 6696967.f2.txt]

Gene ID	Gene Symbol	Type	group1 Expression	group1 Average Read Count	group2 Expression	group2 Average Read Count	patient1-pre-MSCT Expression	patient1-post-MSCT Expression	patient2-post-MSCT Expression	patient2-pre-MSCT Expression	patient3-post-MSCT Expression	patient3-pre-MSCT Expression	log2 (group2/group1)	Pvalue(group1-vs-group2)
hsa-miR-6755-3p	hsa-miR-6755-3p	miRNA	1	1	0	0	0	0	0	0	0	3
hsa-miR-142-3p	hsa-miR-142-3p	miRNA	169.333	173.333	159	159.667	57	107	66	155	304	296	0.048783695	0.592916178
hsa-miR-6732-3p	hsa-miR-6732-3p	miRNA	0.667	0.667	0.667	0.667	0	0	0	0	2	2	0.167269663	0.90762092
hsa-miR-7848-3p	hsa-miR-7848-3p	miRNA	2.333	2.333	1	1	2	2	0	0	1	5	-1.055122759	0.267869251
hsa-miR-610	hsa-miR-610	miRNA	0.333	0.333	1	1	0	0	0	0	3	1	1.752232163	0.257962454
hsa-miR-15a-3p	hsa-miR-15a-3p	miRNA	1	1	3.333	3.333	0	6	0	0	4	3	1.904235257	0.028806044
hsa-miR-423-3p	hsa-miR-423-3p	miRNA	61387	96455.667	62476.333	93916.667	64612	69550	55784	53307	62095	66242	0.12878487	3.97E-254
hsa-miR-4433b-5p	hsa-miR-4433b-5p	miRNA	369	374.667	667.667	678.333	251	115	771	836	1117	20	1.023656422	6.22E-85
hsa-miR-5004-5p	hsa-miR-5004-5p	miRNA	0	0	2	2	0	6	0	0	0	0	3.752232163	0.01541853
hsa-miR-331-5p	hsa-miR-331-5p	miRNA	5	5	7	7	5	8	0	0	13	10	0.65269649	0.177384523
hsa-miR-130a-3p	hsa-miR-130a-3p	miRNA	135.667	136.333	160.333	161.333	150	283	76	125	122	132	0.410175867	2.19E-05
hsa-miR-7110-3p	hsa-miR-7110-3p	miRNA	1.667	2	3	3	4	0	3	0	6	1	0.752232163	0.31717058
hsa-miR-4659b-3p	hsa-miR-4659b-3p	miRNA	33.333	34.333	26.333	26.333	27	24	18	21	37	52	-0.215450116	0.31548401
hsa-miR-6513-5p	hsa-miR-6513-5p	miRNA	71.667	72.667	79	79	48	99	76	67	62	100	0.287828587	0.033279584
hsa-miR-431-5p	hsa-miR-431-5p	miRNA	240	245	221.333	225	209	295	210	297	159	214	0.044412915	0.563117149
hsa-miR-6716-3p	hsa-miR-6716-3p	miRNA	0	0	0.667	0.667	0	0	2	0	0	0
hsa-miR-342-3p	hsa-miR-342-3p	miRNA	1262.333	1315.333	985.667	1007.333	1448	622	872	253	1463	2086	-0.217617633	3.52E-10
hsa-miR-574-5p	hsa-miR-574-5p	miRNA	1119.667	1147.333	1234.333	1256.333	1334	1398	1594	1335	711	690	0.29820436	1.63E-18
hsa-miR-3074-3p	hsa-miR-3074-3p	miRNA	4.667	4.667	5	5	7	5	8	0	2	7	0.266805336	0.618326153
hsa-miR-4536-5p	hsa-miR-4536-5p	miRNA	0.333	0.333	2	2	0	0	6	0	0	1	2.752232163	0.034601371
hsa-miR-668-3p	hsa-miR-668-3p	miRNA	1.333	1.333	4	4.333	2	0	4	0	8	2	1.867709381	0.013882683
hsa-miR-1908-3p	hsa-miR-1908-3p	miRNA	29	29	35	35	25	38	23	47	44	15	0.438571685	0.035442561
hsa-miR-4677-5p	hsa-miR-4677-5p	miRNA	0.667	0.667	0	0	0	0	0	0	0	2
hsa-miR-3186-3p	hsa-miR-3186-3p	miRNA	0.333	0.333	0	0	0	0	0	0	0	1
hsa-miR-19a-3p	hsa-miR-19a-3p	miRNA	4.333	4.333	5.667	6	5	10	0	0	7	8	0.636754946	0.221834871
hsa-miR-7705	hsa-miR-7705	miRNA	10	10	6.667	6.667	17	3	5	0	12	13	-0.417692838	0.310546717
hsa-miR-10b-5p	hsa-miR-10b-5p	miRNA	331.333	337.333	240.667	241.667	393	127	125	38	470	563	-0.313886727	6.59E-06
hsa-miR-6882-5p	hsa-miR-6882-5p	miRNA	1.667	1.667	4.333	4.667	4	3	10	0	0	1	1.65269649	0.019027075
hsa-miR-4454	hsa-miR-4454	miRNA	10	10	7.333	7.333	17	7	10	10	5	3	-0.280189314	0.486023479
hsa-miR-512-3p	hsa-miR-512-3p	miRNA	0	0	1	1	0	0	0	0	3	0
hsa-miR-548h-5p	hsa-miR-548h-5p	miRNA	0.333	0.333	0	0	1	0	0	0	0	0
hsa-miR-153-3p	hsa-miR-153-3p	miRNA	1.333	1.667	3.333	3.333	1	0	0	0	10	3	1.167269663	0.127856085
hsa-miR-6514-3p	hsa-miR-6514-3p	miRNA	1.667	1.667	2	2	1	3	1	2	2	2	0.430304069	0.621302944
hsa-miR-381-5p	hsa-miR-381-5p	miRNA	1	1	0.333	0.333	3	0	0	0	1	0	-1.417692838	0.360062743
hsa-miR-6741-3p	hsa-miR-6741-3p	miRNA	7.333	7.333	21	21.333	12	16	4	0	43	10	1.707838044	2.87E-07
hsa-miR-6738-3p	hsa-miR-6738-3p	miRNA	0.333	0.333	2.333	2.333	0	0	1	0	6	1	2.974624585	0.01762232
hsa-miR-6755-5p	hsa-miR-6755-5p	miRNA	0.667	0.667	0.333	0.333	0	0	0	0	1	2	-0.832730337	0.627125208
hsa-miR-27b-3p	hsa-miR-27b-3p	miRNA	24539	29657.333	26475.667	31236.667	16352	31644	25130	20637	22653	36628	0.242121289	1.27E-283
hsa-miR-3682-3p	hsa-miR-3682-3p	miRNA	4.667	4.667	4.667	4.667	11	0	14	0	0	3	0.167269663	0.758833609
hsa-miR-6818-5p	hsa-miR-6818-5p	miRNA	2.333	2.333	1.333	1.333	0	0	3	0	1	7	-0.640085259	0.470125463
hsa-miR-6883-3p	hsa-miR-6883-3p	miRNA	0	0	1	1	0	0	2	0	1	0
hsa-miR-675-5p	hsa-miR-675-5p	miRNA	0	0	0.667	0.667	0	0	0	0	2	0
hsa-miR-199a-5p	hsa-miR-199a-5p	miRNA	1880.333	1913.667	1687.333	1711.333	1273	2059	1596	2147	1407	2221	0.006050903	0.826853054
hsa-miR-519c-5p	hsa-miR-519c-5p	miRNA	0	0	0.333	0.333	0	0	0	0	1	0
hsa-miR-548aq-5p	hsa-miR-548aq-5p	miRNA	1	1	0	0	0	0	0	0	0	3
hsa-miR-3130-5p	hsa-miR-3130-5p	miRNA	3.333	3.667	3	3	10	6	3	0	0	0	-0.122236954	0.849981998
hsa-miR-24-2-5p	hsa-miR-24-2-5p	miRNA	8	8.667	6.667	7	2	4	10	14	6	8	-0.140852633	0.73838414
hsa-miR-326	hsa-miR-326	miRNA	208.667	216.333	280.333	284.333	200	333	145	164	363	262	0.561596926	5.71E-14
hsa-miR-548ad-5p	hsa-miR-548ad-5p	miRNA	13	13.333	4.333	4.333	11	0	13	16	0	12	-1.454218714	6.58E-04
hsa-miR-487b-5p	hsa-miR-487b-5p	miRNA	6	6	4.667	4.667	7	9	3	10	2	1	-0.195300417	0.702679668
hsa-miR-6774-3p	hsa-miR-6774-3p	miRNA	0	0	0.333	0.333	0	0	1	0	0	0
hsa-miR-4767	hsa-miR-4767	miRNA	0	0	0.667	0.667	0	0	0	0	2	0
hsa-miR-584-5p	hsa-miR-584-5p	miRNA	20438.667	24527	21216.333	24702.333	21674	10517	29802	5392	23330	34250	0.177546202	2.26E-124
hsa-miR-4657	hsa-miR-4657	miRNA	1	1	3.667	3.667	2	10	0	0	1	1	2.041738781	0.016372155
hsa-miR-935	hsa-miR-935	miRNA	2.667	2.667	4	4	8	9	0	0	3	0	0.752232163	0.24807628
hsa-miR-6742-5p	hsa-miR-6742-5p	miRNA	0.333	0.333	0	0	0	0	0	0	0	1
hsa-miR-877-3p	hsa-miR-877-3p	miRNA	5.667	5.667	8.333	8.333	8	3	5	3	17	6	0.723663011	0.107007194
hsa-miR-19b-3p	hsa-miR-19b-3p	miRNA	1116.667	1145	896.667	913.333	829	1263	716	947	711	1574	-0.158864543	1.58E-05
hsa-miR-542-5p	hsa-miR-542-5p	miRNA	160.333	161.667	179	180	167	331	103	176	103	138	0.322244323	3.49E-04
hsa-miR-296-3p	hsa-miR-296-3p	miRNA	0.333	0.333	0.333	0.333	0	0	0	0	1	1	0.167269663	0.934604888
hsa-miR-150-3p	hsa-miR-150-3p	miRNA	14	14	17	17	0	17	29	42	5	0	0.447377582	0.135441669
hsa-miR-655-5p	hsa-miR-655-5p	miRNA	4	4	2	2	11	0	3	0	3	1	-0.832730337	0.234083226
hsa-miR-548ae-5p	hsa-miR-548ae-5p	miRNA	13	13.333	4.333	4.333	11	0	13	16	0	12	-1.454218714	6.58E-04
hsa-miR-1302	hsa-miR-1302	miRNA	0.333	0.333	0	0	0	0	0	0	0	1
hsa-miR-224-3p	hsa-miR-224-3p	miRNA	0.667	0.667	0	0	0	0	0	0	0	2
hsa-miR-16-5p	hsa-miR-16-5p	miRNA	16168.667	19387.667	14042	15517.667	13666	11019	8931	1728	22176	33112	-0.15395788	1.03E-66
hsa-miR-766-5p	hsa-miR-766-5p	miRNA	56.667	56.667	48.333	49	74	45	63	67	37	29	-0.042448929	0.79346827
hsa-miR-3159	hsa-miR-3159	miRNA	1	1	1	1	2	2	0	0	1	1	0.167269663	0.886985793
hsa-miR-6754-3p	hsa-miR-6754-3p	miRNA	0	0	4.333	4.333	0	13	0	0	0	0	4.867709381	1.37E-04
hsa-miR-582-5p	hsa-miR-582-5p	miRNA	28	28	17.667	17.667	7	26	20	72	7	5	-0.497127305	0.04637454
hsa-miR-4642	hsa-miR-4642	miRNA	0.333	0.333	1.333	1.333	0	0	0	0	4	1	2.167269663	0.132710441
hsa-miR-6819-3p	hsa-miR-6819-3p	miRNA	40	42.333	23.333	23.333	30	11	20	28	39	62	-0.692132007	9.78E-04
hsa-miR-145-5p	hsa-miR-145-5p	miRNA	674.667	689.333	823.667	848.667	1150	1824	369	434	278	440	0.467265896	4.74E-28
hsa-miR-548e-5p	hsa-miR-548e-5p	miRNA	0.333	0.333	0	0	0	0	0	0	0	1
hsa-miR-651-5p	hsa-miR-651-5p	miRNA	77.333	79.333	82.667	85.333	48	77	64	32	107	152	0.272451899	0.035748779
hsa-miR-200c-3p	hsa-miR-200c-3p	miRNA	139.667	140	94	94.667	119	65	76	53	141	247	-0.397228735	2.93E-04
hsa-miR-2355-5p	hsa-miR-2355-5p	miRNA	0	0	0.667	0.667	0	2	0	0	0	0
hsa-miR-376b-3p	hsa-miR-376b-3p	miRNA	212.667	214	176.667	176.667	101	291	139	431	100	106	-0.109311275	0.195288688
hsa-miR-197-3p	hsa-miR-197-3p	miRNA	1737.667	1785.667	2157.667	2202.667	2504	2646	1770	839	2057	1870	0.470058053	8.60E-71
hsa-miR-1246	hsa-miR-1246	miRNA	60.667	60.667	33.667	33.667	66	36	43	91	22	25	-0.682313495	9.73E-05
hsa-miR-21-5p	hsa-miR-21-5p	miRNA	12309.667	14075.667	7997.667	8434.333	7446	6441	6273	2822	11279	26661	-0.571587647	0
hsa-miR-6781-3p	hsa-miR-6781-3p	miRNA	0.667	0.667	0.333	0.333	2	1	0	0	0	0	-0.832730337	0.627125208
hsa-miR-1185-1-3p	hsa-miR-1185-1-3p	miRNA	7.333	7.333	4.333	4.333	7	3	0	0	10	15	-0.591722238	0.232606564
hsa-miR-6885-3p	hsa-miR-6885-3p	miRNA	7.667	7.667	8.667	9.333	11	12	7	5	7	7	0.451062629	0.265005647
hsa-miR-5193	hsa-miR-5193	miRNA	17.333	18	21	21.667	26	19	16	9	28	17	0.434749974	0.100692595
hsa-miR-6508-3p	hsa-miR-6508-3p	miRNA	0.333	0.333	1	1	1	3	0	0	0	0	1.752232163	0.257962454
hsa-miR-339-3p	hsa-miR-339-3p	miRNA	411.667	419.667	425	431	224	777	363	807	135	204	0.205713655	3.13E-04
hsa-miR-3181	hsa-miR-3181	miRNA	1	1	2.667	2.667	3	4	0	0	4	0	1.582307162	0.085799756
hsa-miR-676-3p	hsa-miR-676-3p	miRNA	0.333	0.333	0.333	0.333	0	0	0	0	1	1	0.167269663	0.934604888
hsa-miR-513c-5p	hsa-miR-513c-5p	miRNA	0.667	0.667	0	0	0	0	0	0	0	2
hsa-miR-548as-3p	hsa-miR-548as-3p	miRNA	0.333	0.333	0	0	0	0	0	0	0	1
hsa-miR-4485-5p	hsa-miR-4485-5p	miRNA	2.667	3.333	0	0	3	0	0	0	0	5	-4.154658432	0.002307035
hsa-miR-3529-3p	hsa-miR-3529-3p	miRNA	3156.667	3385.333	8297	8964.667	41	16186	69	5	8636	9424	1.572221709	0
hsa-miR-5582-3p	hsa-miR-5582-3p	miRNA	13.667	13.667	9.333	9.333	21	0	11	0	17	20	-0.38292742	0.274219928
hsa-miR-4661-5p	hsa-miR-4661-5p	miRNA	2	2	0.667	0.667	6	0	0	0	2	0	-1.417692838	0.195543614
hsa-miR-4786-5p	hsa-miR-4786-5p	miRNA	3	3.667	0	0	0	0	0	9	0	0	-4.292161956	0.001262598
hsa-miR-3174	hsa-miR-3174	miRNA	3.667	3.667	7.667	7.667	5	0	20	0	3	6	1.2314	0.015991965
hsa-miR-210-3p	hsa-miR-210-3p	miRNA	4.333	4.333	4	4	3	0	6	9	6	1	0.051792445	0.928454934
hsa-miR-548ba	hsa-miR-548ba	miRNA	0.333	0.333	0	0	0	0	0	0	0	1
hsa-miR-4804-3p	hsa-miR-4804-3p	miRNA	0	0	0.333	0.333	0	0	0	0	1	0
hsa-miR-4749-3p	hsa-miR-4749-3p	miRNA	0.333	0.333	0.667	0.667	1	0	0	0	2	0	1.167269663	0.495914409
hsa-miR-636	hsa-miR-636	miRNA	10	10	13.333	13.667	6	19	13	18	8	6	0.617931072	0.072635622
hsa-miR-4433a-5p	hsa-miR-4433a-5p	miRNA	180	181	220.333	224.667	242	202	166	98	293	200	0.479066056	7.46E-09
hsa-miR-3200-3p	hsa-miR-3200-3p	miRNA	0.333	0.333	0.667	0.667	0	0	1	0	1	1	1.167269663	0.495914409
hsa-miR-302d-3p	hsa-miR-302d-3p	miRNA	1.667	1.667	0	0	5	0	0	0	0	0	-3.154658432	0.051671067
hsa-miR-6762-5p	hsa-miR-6762-5p	miRNA	0.667	0.667	1	1	2	0	0	0	3	0	0.752232163	0.56359016
hsa-miR-191-5p	hsa-miR-191-5p	miRNA	127301.333	416269.333	134495	405693.333	132342	135428	117524	98138	150533	151424	0.130141979	0
hsa-miR-1976	hsa-miR-1976	miRNA	0	0	1.333	1.333	0	3	0	0	1	0
hsa-miR-17-3p	hsa-miR-17-3p	miRNA	4	4	4.333	4.667	0	6	2	11	5	1	0.389662084	0.491350681
hsa-miR-6737-5p	hsa-miR-6737-5p	miRNA	1	1	0	0	0	0	0	0	0	3
hsa-miR-7706	hsa-miR-7706	miRNA	9.667	9.667	6.667	6.667	25	16	0	0	4	4	-0.368783238	0.374661009
hsa-miR-6810-5p	hsa-miR-6810-5p	miRNA	7	7.667	12	12	6	9	27	9	0	6	0.813632708	0.032276094
hsa-miR-299-3p	hsa-miR-299-3p	miRNA	2	2	1.667	1.667	0	4	0	0	1	6	-0.095764743	0.912455867
hsa-miR-433-3p	hsa-miR-433-3p	miRNA	82.333	84	120.333	123	101	124	102	46	135	100	0.717466745	7.95E-10
hsa-miR-1228-5p	hsa-miR-1228-5p	miRNA	21	21.333	23	23	57	40	0	0	29	6	0.27579412	0.270090296
hsa-miR-4422	hsa-miR-4422	miRNA	5	5	3.333	3.667	14	4	0	0	6	1	-0.280189314	0.62229248
hsa-miR-7-1-3p	hsa-miR-7-1-3p	miRNA	1445.667	1476.667	1700.333	1727	1635	2112	1169	646	1820	2056	0.393193548	1.15E-40
hsa-miR-329-3p	hsa-miR-329-3p	miRNA	21	21	25.333	25.333	37	54	16	22	6	4	0.437917253	0.073949407
hsa-miR-224-5p	hsa-miR-224-5p	miRNA	26.333	27.333	15	15	42	6	1	0	38	37	-0.698429246	0.007579061
hsa-miR-382-3p	hsa-miR-382-3p	miRNA	4.667	4.667	7	7	11	9	7	0	5	3	0.752232163	0.126520628
hsa-miR-6799-3p	hsa-miR-6799-3p	miRNA	1	1.333	1.333	1.333	0	0	0	0	4	3	0.167269663	0.869648321
hsa-miR-6770-5p	hsa-miR-6770-5p	miRNA	20.333	20.667	11	11.333	19	16	7	32	10	10	-0.699463806	0.02007606
hsa-miR-3064-3p	hsa-miR-3064-3p	miRNA	0.333	0.333	0.333	0.333	0	1	0	0	0	1	0.167269663	0.934604888
hsa-miR-130b-5p	hsa-miR-130b-5p	miRNA	343.667	351.333	313.333	316.667	472	217	311	62	412	497	0.017394214	0.787222279
hsa-miR-4701-5p	hsa-miR-4701-5p	miRNA	39.667	40	51.333	51.333	58	63	34	42	57	19	0.527165608	0.002569078
hsa-miR-18b-5p	hsa-miR-18b-5p	miRNA	2.333	2.333	5.333	5.667	0	0	15	0	1	7	1.447377582	0.0190268
hsa-miR-487a-5p	hsa-miR-487a-5p	miRNA	191.333	198	224	228.667	145	333	240	296	99	133	0.375015308	3.35E-06
hsa-miR-6724-5p	hsa-miR-6724-5p	miRNA	9.333	9.333	19.667	19.667	22	47	0	0	12	6	1.24255779	1.02E-04
hsa-miR-18a-5p	hsa-miR-18a-5p	miRNA	151	156	126	129.333	111	116	64	2	198	340	-0.103182215	0.2960912
hsa-miR-6848-5p	hsa-miR-6848-5p	miRNA	0	0	0.667	0.667	0	0	0	0	2	0
hsa-miR-450a-1-3p	hsa-miR-450a-1-3p	miRNA	17.667	18.333	11.667	11.667	19	6	11	12	18	22	-0.484807034	0.115196391
hsa-miR-3923	hsa-miR-3923	miRNA	0	0	0.333	0.333	0	0	0	0	1	0
hsa-miR-6780a-5p	hsa-miR-6780a-5p	miRNA	0.333	0.333	3.333	3.333	1	10	0	0	0	0	3.489197758	0.002336939
hsa-miR-6802-3p	hsa-miR-6802-3p	miRNA	3	3.333	3	3	1	0	4	7	5	1	0.015266569	0.981597412
hsa-miR-484	hsa-miR-484	miRNA	6172.333	6531	9076	9829.667	7604	6436	3169	1886	17623	9027	0.757108249	0
hsa-miR-4635	hsa-miR-4635	miRNA	0	0	0.667	0.667	0	0	0	0	2	0
hsa-miR-6892-3p	hsa-miR-6892-3p	miRNA	0	0	0.333	0.333	0	0	0	0	1	0
hsa-miR-654-5p	hsa-miR-654-5p	miRNA	873.333	894.333	898	908.667	1192	1081	1143	954	470	474	0.19020817	1.22E-06
hsa-miR-6862-5p	hsa-miR-6862-5p	miRNA	2	2	0.667	0.667	3	0	0	0	2	3	-1.417692838	0.195543614
hsa-miR-2115-3p	hsa-miR-2115-3p	miRNA	0	0	2.333	2.333	0	5	0	0	2	0	3.974624585	0.007658025
hsa-miR-369-5p	hsa-miR-369-5p	miRNA	219	223.667	279	280	311	361	270	109	206	237	0.491346224	4.00E-11
hsa-miR-1273h-3p	hsa-miR-1273h-3p	miRNA	91.667	93	160.333	161.667	87	246	126	121	109	67	0.964989288	1.10E-19
hsa-miR-136-5p	hsa-miR-136-5p	miRNA	1	1	0	0	0	0	0	0	0	3
hsa-miR-942-3p	hsa-miR-942-3p	miRNA	41	41.333	33.333	33.667	87	20	60	0	20	36	-0.128715165	0.504167349
hsa-miR-27a-5p	hsa-miR-27a-5p	miRNA	12.667	12.667	13.333	13.667	10	14	10	17	16	11	0.276894154	0.393460762
hsa-miR-181a-2-3p	hsa-miR-181a-2-3p	miRNA	179.667	185.333	166	167.667	153	93	176	129	229	257	0.02274318	0.79751619
hsa-miR-6775-5p	hsa-miR-6775-5p	miRNA	0	0	2	2	0	6	0	0	0	0	3.752232163	0.01541853
hsa-miR-335-3p	hsa-miR-335-3p	miRNA	150.333	153	100.667	100.667	160	49	29	0	224	291	-0.436675941	3.58E-05
hsa-miR-4732-3p	hsa-miR-4732-3p	miRNA	50.667	51.667	54	54.333	35	74	45	18	43	99	0.239873412	0.137940166
hsa-miR-6810-3p	hsa-miR-6810-3p	miRNA	4	4	3.333	3.333	8	1	6	0	3	4	-0.095764743	0.876442438
hsa-miR-548o-3p	hsa-miR-548o-3p	miRNA	1	1	2	2	0	6	0	0	0	3	1.167269663	0.238235265
hsa-miR-939-5p	hsa-miR-939-5p	miRNA	8.667	9	0	0	0	0	0	21	0	5	-5.587617839	1.49E-07
hsa-miR-181c-3p	hsa-miR-181c-3p	miRNA	0	0	0.333	0.333	0	0	0	0	1	0
hsa-miR-324-3p	hsa-miR-324-3p	miRNA	176	177.333	171.667	173.667	109	260	163	321	92	98	0.13712679	0.122722415
hsa-miR-581	hsa-miR-581	miRNA	0.667	0.667	0	0	0	0	0	0	0	2
hsa-miR-206	hsa-miR-206	miRNA	87	87	121.667	122	139	46	276	76	43	46	0.655063504	1.61E-08
hsa-miR-144-5p	hsa-miR-144-5p	miRNA	0.333	0.333	0	0	0	0	0	0	0	1
hsa-miR-122-5p	hsa-miR-122-5p	miRNA	9529.333	10368	24667.333	32471.667	9942	56347	10339	6137	7316	12509	1.814313475	0
hsa-miR-6502-5p	hsa-miR-6502-5p	miRNA	4.667	4.667	10.333	10.333	3	17	9	0	5	11	1.314111051	0.003258343
hsa-miR-589-5p	hsa-miR-589-5p	miRNA	237.667	241	199	200.667	170	286	207	372	104	171	-0.096962497	0.221814007
hsa-miR-570-3p	hsa-miR-570-3p	miRNA	0	0	1	1	0	0	0	0	3	0
hsa-miR-485-5p	hsa-miR-485-5p	miRNA	790.333	818	778.333	802	743	743	1211	1253	381	375	0.138771056	7.91E-04
hsa-miR-6736-3p	hsa-miR-6736-3p	miRNA	1.333	1.333	0.333	0.333	4	0	0	0	1	0	-1.832730337	0.203579591
hsa-miR-9985	hsa-miR-9985	miRNA	0	0	2	2	0	0	6	0	0	0	3.752232163	0.01541853
hsa-miR-425-5p	hsa-miR-425-5p	miRNA	5060.333	5381	4315.333	4475	4004	5264	3600	5321	4082	5856	-0.098716962	4.15E-09
hsa-miR-181c-5p	hsa-miR-181c-5p	miRNA	712.333	729	702	711	529	726	319	378	1061	1230	0.131200408	0.002778649
hsa-miR-429	hsa-miR-429	miRNA	45.667	46	24.667	25	38	25	12	8	37	91	-0.712436104	4.24E-04
hsa-miR-455-3p	hsa-miR-455-3p	miRNA	0	0	0.333	0.333	0	0	0	0	1	0
hsa-miR-6851-3p	hsa-miR-6851-3p	miRNA	0.333	0.333	2	2.333	0	0	6	0	0	1	2.974624585	0.01762232
hsa-miR-222-5p	hsa-miR-222-5p	miRNA	0	0	1.333	1.333	0	4	0	0	0	0
hsa-miR-412-5p	hsa-miR-412-5p	miRNA	139.667	141	155	155.667	237	208	125	31	132	151	0.310034549	0.001344496
hsa-miR-200b-5p	hsa-miR-200b-5p	miRNA	2.333	2.333	0.333	0.333	3	0	0	0	1	4	-2.640085259	0.035158346
hsa-miR-4762-5p	hsa-miR-4762-5p	miRNA	0	0	1	1	0	0	0	0	3	0
hsa-miR-499b-5p	hsa-miR-499b-5p	miRNA	3	3	2	2	2	4	2	0	0	7	-0.417692838	0.578599379
hsa-miR-211-5p	hsa-miR-211-5p	miRNA	10.667	10.667	14.333	14.333	8	5	11	0	27	24	0.593534417	0.076183118
hsa-miR-6837-5p	hsa-miR-6837-5p	miRNA	1.667	1.667	0.333	0.333	4	0	0	0	1	1	-2.154658432	0.113991073
hsa-miR-508-3p	hsa-miR-508-3p	miRNA	2	2.333	5.667	6	3	0	17	0	0	3	1.529839742	0.011927526
hsa-miR-5192	hsa-miR-5192	miRNA	2	2	3	3	6	0	9	0	0	0	0.752232163	0.31717058
hsa-miR-338-3p	hsa-miR-338-3p	miRNA	4.333	4.333	6.667	6.667	1	4	2	0	14	12	0.788758039	0.120259989
hsa-miR-148a-3p	hsa-miR-148a-3p	miRNA	96.333	98.333	204.667	206.333	86	399	64	109	151	94	1.236494118	4.59E-36
hsa-miR-584-3p	hsa-miR-584-3p	miRNA	8.667	8.667	3	3	18	5	0	0	4	8	-1.363245054	0.008909926
hsa-miR-192-3p	hsa-miR-192-3p	miRNA	0	0	0.333	0.333	0	0	0	0	1	0
hsa-miR-4655-5p	hsa-miR-4655-5p	miRNA	0.333	0.333	2.667	2.667	0	8	0	0	0	1	3.167269663	0.008976188
hsa-miR-3120-5p	hsa-miR-3120-5p	miRNA	10	10.667	10.667	10.667	8	11	2	6	19	16	0.167269663	0.642533106
hsa-miR-485-3p	hsa-miR-485-3p	miRNA	117.333	121.333	107	107.333	160	52	48	19	221	173	-0.009608099	0.930506168
hsa-let-7i-5p	hsa-let-7i-5p	miRNA	130418	426646.333	142693.333	495914	126401	155942	144306	141368	127832	123485	0.384318968	0
hsa-miR-6894-3p	hsa-miR-6894-3p	miRNA	2.333	2.333	3	3.333	4	4	0	0	5	3	0.681842836	0.333312991
hsa-miR-340-5p	hsa-miR-340-5p	miRNA	692.333	702.333	495.667	497.667	466	294	296	67	897	1544	-0.329706486	9.64E-12
hsa-miR-590-5p	hsa-miR-590-5p	miRNA	1.667	1.667	1	1	0	0	0	0	3	5	-0.569695931	0.582338107
hsa-miR-654-3p	hsa-miR-654-3p	miRNA	56.667	58.333	59.667	59.667	84	83	43	3	53	83	0.199874328	0.192100875
hsa-miR-3688-3p	hsa-miR-3688-3p	miRNA	12	12	14.667	15	8	12	9	0	23	28	0.489197758	0.127900019
hsa-miR-378g	hsa-miR-378g	miRNA	14	14.333	20	20.333	13	18	38	21	4	8	0.671742246	0.018364493
hsa-miR-25-3p	hsa-miR-25-3p	miRNA	5862.333	6134.667	5746	5948	5251	7568	4666	4113	5004	8223	0.122689354	5.22E-16
hsa-miR-29a-5p	hsa-miR-29a-5p	miRNA	0	0	1.667	1.667	0	3	0	0	2	0	3.489197758	0.031380389
hsa-miR-3157-5p	hsa-miR-3157-5p	miRNA	11.333	11.667	13	13	15	19	9	0	11	19	0.323388865	0.334927059
hsa-miR-3679-3p	hsa-miR-3679-3p	miRNA	0.333	0.333	0	0	1	0	0	0	0	0
hsa-miR-5696	hsa-miR-5696	miRNA	0	0	0.333	0.333	0	0	0	0	1	0
hsa-miR-550b-3p	hsa-miR-550b-3p	miRNA	1.333	1.333	3.333	3.333	3	10	0	0	0	1	1.489197758	0.066189019
hsa-miR-3180	hsa-miR-3180	miRNA	1.667	1.667	6	6	5	6	12	0	0	0	2.015266569	0.002327829
hsa-miR-140-3p	hsa-miR-140-3p	miRNA	419.667	434	416.667	424.333	499	521	412	323	317	437	0.134772633	0.017681943
hsa-miR-151a-5p	hsa-miR-151a-5p	miRNA	91395	209636.667	93759.667	185186.333	95666	91035	77323	51508	112921	127011	-0.01164378	7.77E-06
hsa-miR-421	hsa-miR-421	miRNA	218.667	224	171	172.667	281	149	92	62	272	313	-0.208239472	0.013092225
hsa-miR-143-3p	hsa-miR-143-3p	miRNA	11537	12600	10361.333	11135.333	16101	17386	6788	5474	6910	13036	-0.011009326	0.308141933
hsa-miR-369-3p	hsa-miR-369-3p	miRNA	137.333	139	89.667	89.667	111	59	72	22	138	279	-0.465171548	2.97E-05
hsa-miR-1270	hsa-miR-1270	miRNA	36	36.667	27.667	28	29	19	49	54	15	25	-0.221772628	0.28615167
hsa-miR-769-3p	hsa-miR-769-3p	miRNA	71.333	73.333	93.333	94	41	146	78	129	56	44	0.525461302	4.74E-05
hsa-miR-132-3p	hsa-miR-132-3p	miRNA	0.333	0.333	0.667	0.667	1	0	0	0	2	0	1.167269663	0.495914409
hsa-miR-625-5p	hsa-miR-625-5p	miRNA	2947.667	3015	2984	3054.667	1606	1546	4573	3447	2833	3790	0.186126619	2.93E-18
hsa-miR-154-3p	hsa-miR-154-3p	miRNA	13.667	13.667	8.667	8.667	16	6	9	7	11	18	-0.489842624	0.169751461
hsa-miR-6870-3p	hsa-miR-6870-3p	miRNA	0	0	0.333	0.333	0	0	1	0	0	0
hsa-miR-1287-3p	hsa-miR-1287-3p	miRNA	9.667	9.667	5.333	5.333	16	4	4	4	8	9	-0.690711332	0.115825542
hsa-miR-122-3p	hsa-miR-122-3p	miRNA	4	4	3.667	3.667	4	1	1	0	9	8	0.041738781	0.944671349
hsa-miR-432-3p	hsa-miR-432-3p	miRNA	32.333	32.333	58.667	59.667	34	109	33	36	34	27	1.051172598	3.24E-09
hsa-miR-548d-5p	hsa-miR-548d-5p	miRNA	3	3	0.667	0.667	0	0	0	0	2	9	-2.002655339	0.043023388
hsa-miR-200b-3p	hsa-miR-200b-3p	miRNA	11	11	9	9.333	17	6	5	0	16	16	-0.069769535	0.850332224
hsa-miR-3157-3p	hsa-miR-3157-3p	miRNA	9.667	9.667	3	3	4	0	9	20	0	5	-1.520786331	0.002713145
hsa-miR-937-3p	hsa-miR-937-3p	miRNA	1.333	1.333	0	0	1	0	0	0	0	3
hsa-miR-1294	hsa-miR-1294	miRNA	144.333	149.333	152.667	155	162	198	178	192	82	79	0.221001647	0.020552216
hsa-miR-4523	hsa-miR-4523	miRNA	1	1	0	0	2	0	0	0	0	1
hsa-miR-6855-5p	hsa-miR-6855-5p	miRNA	0	0	0.333	0.333	0	0	0	0	1	0
hsa-miR-3121-5p	hsa-miR-3121-5p	miRNA	0.667	0.667	0	0	1	0	0	0	0	1
hsa-miR-324-5p	hsa-miR-324-5p	miRNA	64.667	65	67.333	67.333	41	84	49	86	69	67	0.218150832	0.131661407
hsa-miR-219a-1-3p	hsa-miR-219a-1-3p	miRNA	2	2	1.333	1.333	4	0	0	0	4	2	-0.417692838	0.650182917
hsa-miR-26a-1-3p	hsa-miR-26a-1-3p	miRNA	46.667	47.667	47.667	47.667	61	19	32	10	92	69	0.167269663	0.326488928
hsa-miR-4436b-5p	hsa-miR-4436b-5p	miRNA	0	0	0.333	0.333	0	0	0	0	1	0
hsa-miR-4722-5p	hsa-miR-4722-5p	miRNA	0.333	0.667	0	0	0	0	0	0	0	1
hsa-miR-548as-5p	hsa-miR-548as-5p	miRNA	0	0	1.333	1.333	0	4	0	0	0	0
hsa-miR-7855-5p	hsa-miR-7855-5p	miRNA	23.333	23.667	28.667	28.667	22	43	21	23	22	25	0.443787298	0.054307307
hsa-miR-7-2-3p	hsa-miR-7-2-3p	miRNA	0	0	0.333	0.333	0	0	0	0	1	0
hsa-miR-15a-5p	hsa-miR-15a-5p	miRNA	756.667	788	611	618	515	658	320	142	855	1613	-0.183319129	3.88E-05
hsa-miR-708-5p	hsa-miR-708-5p	miRNA	0	0	2.667	2.667	0	0	0	0	8	0	4.167269663	0.003840696
hsa-miR-505-3p	hsa-miR-505-3p	miRNA	76.333	77.667	100	101	69	139	50	82	111	78	0.546257502	1.25E-05
hsa-miR-888-5p	hsa-miR-888-5p	miRNA	0	0	0.667	0.667	0	0	0	0	2	0
hsa-miR-32-3p	hsa-miR-32-3p	miRNA	2.667	2.667	1.667	1.667	0	0	0	0	5	8	-0.510802242	0.528597328
hsa-miR-5698	hsa-miR-5698	miRNA	0	0	2.333	2.333	0	5	0	0	2	0	3.974624585	0.007658025
hsa-miR-549a-5p	hsa-miR-549a-5p	miRNA	3	3	3.667	3.667	4	1	10	0	0	5	0.45677628	0.479699808
hsa-miR-30d-3p	hsa-miR-30d-3p	miRNA	51.333	52	41.333	42	31	34	44	30	46	93	-0.140852633	0.413290055
hsa-miR-362-5p	hsa-miR-362-5p	miRNA	88.667	89.333	65	65.333	92	61	30	85	104	89	-0.284109684	0.034866966
hsa-miR-1307-5p	hsa-miR-1307-5p	miRNA	39.333	39.333	28.667	29.333	11	31	33	92	22	15	-0.255941768	0.20501741
hsa-miR-29a-3p	hsa-miR-29a-3p	miRNA	83.333	83.667	96.333	96.333	69	88	114	67	87	114	0.370651791	0.002845782
hsa-miR-6734-3p	hsa-miR-6734-3p	miRNA	1.333	1.333	0.667	0.667	4	0	0	0	2	0	-0.832730337	0.492087392
hsa-miR-2277-3p	hsa-miR-2277-3p	miRNA	29	29.333	13	13	17	20	10	58	9	12	-1.006759737	1.57E-04
hsa-miR-379-3p	hsa-miR-379-3p	miRNA	25	25.333	21.333	21.333	34	18	13	0	33	41	-0.080657851	0.741079896
hsa-miR-1908-5p	hsa-miR-1908-5p	miRNA	912.333	926	793.667	802.333	548	318	1853	1661	210	528	-0.039540795	0.323933202
hsa-miR-496	hsa-miR-496	miRNA	109.667	110	92.667	93	155	137	65	45	76	129	-0.07493124	0.521989034
hsa-miR-551b-3p	hsa-miR-551b-3p	miRNA	0	0	2.667	2.667	0	0	0	0	8	0	4.167269663	0.003840696
hsa-miR-320c	hsa-miR-320c	miRNA	147.333	148.333	133	133	159	75	252	230	72	53	0.009853073	0.920966072
hsa-miR-185-5p	hsa-miR-185-5p	miRNA	13493.667	14741.333	12755	13863.333	14748	19227	9296	11768	9742	13965	0.078676827	1.22E-15
hsa-miR-98-5p	hsa-miR-98-5p	miRNA	27823.333	33730.333	33563.333	41484.667	35241	37284	36694	18437	26712	29792	0.465801281	0
hsa-miR-199a-3p	hsa-miR-199a-3p	miRNA	37512.667	51655.667	38654.333	49310.333	38270	48608	27657	12691	39698	61577	0.100233046	2.54E-82
hsa-miR-6827-5p	hsa-miR-6827-5p	miRNA	0	0	1.667	1.667	0	0	5	0	0	0	3.489197758	0.031380389
hsa-miR-3127-5p	hsa-miR-3127-5p	miRNA	1	1	4.667	4.667	3	9	5	0	0	0	2.389662084	0.002843457
hsa-miR-7109-3p	hsa-miR-7109-3p	miRNA	2	2.333	2.333	2.333	3	0	3	0	4	3	0.167269663	0.828137579
hsa-miR-4755-3p	hsa-miR-4755-3p	miRNA	1	1	0	0	3	0	0	0	0	0
hsa-miR-4670-5p	hsa-miR-4670-5p	miRNA	0.667	0.667	0	0	2	0	0	0	0	0
hsa-miR-5001-3p	hsa-miR-5001-3p	miRNA	5	5	15	15	4	27	12	0	6	11	1.752232163	1.18E-05
hsa-miR-1256	hsa-miR-1256	miRNA	1	1	0.333	0.333	2	0	0	0	1	1	-1.417692838	0.360062743
hsa-miR-6813-5p	hsa-miR-6813-5p	miRNA	0	0	1	1	0	3	0	0	0	0
hsa-miR-1227-3p	hsa-miR-1227-3p	miRNA	19.667	20	15	16.333	22	1	14	8	30	29	-0.124911089	0.651849467
hsa-miR-4492	hsa-miR-4492	miRNA	0.333	0.333	0	0	0	0	0	1	0	0
hsa-miR-4779	hsa-miR-4779	miRNA	0.333	0.333	0	0	0	0	0	0	0	1
hsa-miR-659-3p	hsa-miR-659-3p	miRNA	0	0	0.667	0.667	0	0	0	0	2	0
hsa-miR-4772-3p	hsa-miR-4772-3p	miRNA	7.667	7.667	1	1	1	3	0	22	0	0	-2.771329793	8.92E-05
hsa-miR-495-5p	hsa-miR-495-5p	miRNA	124.333	127.667	146.667	148.667	137	173	143	84	124	152	0.386968981	1.14E-04
hsa-miR-4783-3p	hsa-miR-4783-3p	miRNA	0	0	0.333	0.333	0	0	0	0	1	0
hsa-miR-643	hsa-miR-643	miRNA	3.333	3.333	2	2	0	0	0	0	6	10	-0.569695931	0.436699355
hsa-miR-141-5p	hsa-miR-141-5p	miRNA	0.667	0.667	0	0	0	0	0	0	0	2
hsa-miR-4676-3p	hsa-miR-4676-3p	miRNA	4.667	4.667	0	0	0	0	0	13	0	1	-4.640085259	2.14E-04
hsa-miR-374b-3p	hsa-miR-374b-3p	miRNA	150	151.333	113	114	99	46	91	8	202	343	-0.24142631	0.018727737
hsa-miR-3940-5p	hsa-miR-3940-5p	miRNA	1	1	0	0	3	0	0	0	0	0
hsa-miR-431-3p	hsa-miR-431-3p	miRNA	5.333	5.333	8.333	8.333	7	17	3	4	5	5	0.811125853	0.075170814
hsa-miR-3667-5p	hsa-miR-3667-5p	miRNA	0.667	0.667	0.667	0.667	0	0	0	0	2	2	0.167269663	0.90762092
hsa-miR-450a-5p	hsa-miR-450a-5p	miRNA	124.667	129.333	154.667	157	150	221	113	96	130	128	0.44694007	5.81E-06
hsa-miR-6832-5p	hsa-miR-6832-5p	miRNA	0	0	4.333	4.333	0	0	11	0	2	0	4.867709381	1.37E-04
hsa-miR-1296-5p	hsa-miR-1296-5p	miRNA	70.333	71	122.667	124.333	64	63	49	15	256	132	0.975591863	9.38E-16
hsa-miR-4482-5p	hsa-miR-4482-5p	miRNA	7.667	7.667	4.333	4.333	6	11	0	16	2	1	-0.655852575	0.180953408
hsa-miR-6892-5p	hsa-miR-6892-5p	miRNA	3.333	3.333	5	5	8	5	7	0	3	2	0.752232163	0.19657611
hsa-miR-328-3p	hsa-miR-328-3p	miRNA	3311.333	3465	3599.667	3732.333	3164	2735	3152	1833	4912	4937	0.274492149	1.79E-44
hsa-miR-6511b-3p	hsa-miR-6511b-3p	miRNA	8.333	8.333	12	12.333	7	6	9	8	21	10	0.732866839	0.047411649
hsa-miR-3912-3p	hsa-miR-3912-3p	miRNA	2.333	2.333	1.333	1.333	1	0	0	0	4	6	-0.640085259	0.470125463
hsa-miR-214-5p	hsa-miR-214-5p	miRNA	4.667	4.667	8.333	8.333	4	6	14	0	5	10	1.00377093	0.033192914
hsa-miR-4638-3p	hsa-miR-4638-3p	miRNA	2.667	3	3.333	3.333	7	5	4	0	1	1	0.319272756	0.629529354
hsa-miR-665	hsa-miR-665	miRNA	1.333	1.333	1	1	1	0	0	0	3	3	-0.247767837	0.821036625
hsa-miR-513a-5p	hsa-miR-513a-5p	miRNA	0.333	0.333	2	2	1	6	0	0	0	0	2.752232163	0.034601371
hsa-miR-1250-5p	hsa-miR-1250-5p	miRNA	66.333	66.667	68.667	69.667	24	135	50	122	21	53	0.230772605	0.105520041
hsa-miR-432-5p	hsa-miR-432-5p	miRNA	946.667	968	1431.333	1457	1114	2401	1612	1412	281	314	0.757191588	6.28E-109
hsa-miR-204-3p	hsa-miR-204-3p	miRNA	16.667	16.667	10	10	8	10	14	42	6	0	-0.569695931	0.082005188
hsa-miR-381-3p	hsa-miR-381-3p	miRNA	56	56.667	56.667	56.667	42	93	37	36	40	90	0.167269663	0.284691149
hsa-miR-549a-3p	hsa-miR-549a-3p	miRNA	0.333	0.333	1	1	0	0	0	0	3	1	1.752232163	0.257962454
hsa-miR-550a-3-5p	hsa-miR-550a-3-5p	miRNA	0.333	0.333	4.667	4.667	0	0	7	0	7	1	3.974624585	1.62E-04
hsa-miR-93-5p	hsa-miR-93-5p	miRNA	15749.333	18198	14645.667	16104.667	15182	16301	14367	6130	13269	25936	-0.009031441	0.314627635
hsa-miR-4709-3p	hsa-miR-4709-3p	miRNA	0.333	0.333	0	0	0	0	0	0	0	1
hsa-miR-4682	hsa-miR-4682	miRNA	0.333	0.333	0	0	0	0	0	0	0	1
hsa-miR-6836-3p	hsa-miR-6836-3p	miRNA	2.333	2.333	0.667	0.667	1	0	0	1	2	5	-1.640085259	0.119653548
hsa-miR-548k	hsa-miR-548k	miRNA	987.667	1003.333	855	859.667	699	839	711	1067	1015	1197	-0.055682051	0.149334305
hsa-miR-597-3p	hsa-miR-597-3p	miRNA	2.333	2.333	2.667	2.667	5	0	0	0	8	2	0.359914741	0.629115678
hsa-miR-6801-5p	hsa-miR-6801-5p	miRNA	0.667	0.667	3	3	2	9	0	0	0	0	2.337194664	0.018201103
hsa-miR-4791	hsa-miR-4791	miRNA	0	0	1	1	0	0	3	0	0	0
hsa-miR-3661	hsa-miR-3661	miRNA	11.333	11.333	4.667	4.667	8	0	12	15	2	11	-1.112838256	0.010777912
hsa-miR-6736-5p	hsa-miR-6736-5p	miRNA	9	9	7.667	7.667	6	5	8	21	10	0	-0.064055883	0.875356558
hsa-miR-6515-3p	hsa-miR-6515-3p	miRNA	6.333	7	4	4	8	1	3	0	8	11	-0.640085259	0.210928175
hsa-miR-1276	hsa-miR-1276	miRNA	0.333	0.333	8.333	8.333	0	0	15	0	10	1	4.811125853	1.31E-07
hsa-miR-5697	hsa-miR-5697	miRNA	5.667	5.667	0.333	0.333	11	0	0	0	1	6	-3.920193179	9.43E-05
hsa-miR-2276-3p	hsa-miR-2276-3p	miRNA	10	10.333	5	5	0	7	6	26	2	4	-0.880036052	0.045000199
hsa-miR-3120-3p	hsa-miR-3120-3p	miRNA	21.667	22.333	10.333	10.333	25	18	5	23	8	17	-0.944623217	0.001758849
hsa-miR-493-3p	hsa-miR-493-3p	miRNA	1296	1308	1339.333	1351.333	1503	2032	1396	1658	590	727	0.21429071	3.15E-11
hsa-miR-6130	hsa-miR-6130	miRNA	0.333	0.333	0	0	1	0	0	0	0	0
hsa-miR-181b-2-3p	hsa-miR-181b-2-3p	miRNA	1	1	0.667	0.667	2	0	0	0	2	1	-0.417692838	0.748453948
hsa-miR-6793-3p	hsa-miR-6793-3p	miRNA	0.333	0.333	2	2	0	1	4	0	1	1	2.752232163	0.034601371
hsa-miR-541-5p	hsa-miR-541-5p	miRNA	0	0	1.667	1.667	0	2	0	0	3	0	3.489197758	0.031380389
hsa-miR-3140-3p	hsa-miR-3140-3p	miRNA	0.333	0.333	0	0	0	0	0	0	0	1
hsa-miR-99a-5p	hsa-miR-99a-5p	miRNA	3549.667	3670.667	3964.667	4083.333	3414	6085	2559	2396	3250	4839	0.320974897	1.27E-64
hsa-miR-196a-5p	hsa-miR-196a-5p	miRNA	28.333	29.333	89	89.667	27	47	197	33	23	25	1.779300407	2.58E-27
hsa-miR-101-3p	hsa-miR-101-3p	miRNA	10.333	10.333	9	9	10	2	5	0	20	21	-0.032039145	0.932630883
hsa-miR-3134	hsa-miR-3134	miRNA	0.333	0.333	0	0	0	0	0	0	0	1
hsa-miR-218-5p	hsa-miR-218-5p	miRNA	6	6.333	17.333	17.333	9	6	34	0	12	9	1.619781867	8.40E-06
hsa-miR-127-5p	hsa-miR-127-5p	miRNA	1	1	0	0	0	0	0	0	0	3
hsa-miR-494-5p	hsa-miR-494-5p	miRNA	10.333	10.667	17	17.667	15	27	20	9	4	7	0.895190117	0.004831753
hsa-miR-4656	hsa-miR-4656	miRNA	0	0	2.333	2.333	0	0	7	0	0	0	3.974624585	0.007658025
hsa-miR-193b-3p	hsa-miR-193b-3p	miRNA	1.667	1.667	7	7	4	20	1	0	0	1	2.237658991	4.42E-04
hsa-miR-6861-3p	hsa-miR-6861-3p	miRNA	3	3	4	4	2	6	1	0	5	7	0.582307162	0.357134888
hsa-miR-589-3p	hsa-miR-589-3p	miRNA	11	11.667	6.333	6.333	5	12	0	23	7	5	-0.714085841	0.075269744
hsa-miR-106a-5p	hsa-miR-106a-5p	miRNA	22.333	22.333	10.667	10.667	3	12	15	41	5	23	-0.898819528	0.002697765
hsa-miR-135a-5p	hsa-miR-135a-5p	miRNA	20.667	20.667	35.333	35.667	10	9	10	10	87	42	0.954540339	2.38E-05
hsa-miR-1273h-5p	hsa-miR-1273h-5p	miRNA	113	115.333	71.667	72	56	117	66	258	32	25	-0.512471063	3.23E-05
hsa-miR-3617-5p	hsa-miR-3617-5p	miRNA	10.667	11	9.333	9.333	25	0	16	0	12	7	-0.069769535	0.850332224
hsa-miR-450a-2-3p	hsa-miR-450a-2-3p	miRNA	0.333	0.333	0	0	0	0	0	0	0	1
hsa-miR-125a-5p	hsa-miR-125a-5p	miRNA	683.333	704	743.333	756.667	656	1027	1057	1266	146	128	0.271352126	4.69E-10
hsa-miR-378e	hsa-miR-378e	miRNA	1	1	0.667	0.667	1	0	1	2	1	0	-0.417692838	0.748453948
hsa-miR-378c	hsa-miR-378c	miRNA	0	0	5	5.333	0	0	14	0	1	0	5.167269663	2.02E-05
hsa-miR-103a-2-5p	hsa-miR-103a-2-5p	miRNA	32	35	52.667	55	21	85	40	21	33	54	0.819346359	4.00E-06
hsa-miR-9-5p	hsa-miR-9-5p	miRNA	17.333	17.667	5.333	5.333	13	10	0	8	6	31	-1.560650792	3.61E-05
hsa-miR-6877-5p	hsa-miR-6877-5p	miRNA	1.667	1.667	0.333	0.333	4	0	0	0	1	1	-2.154658432	0.113991073
hsa-miR-186-5p	hsa-miR-186-5p	miRNA	245.333	248	256.667	258	217	184	130	253	456	266	0.224300608	0.002437
hsa-miR-486-5p	hsa-miR-486-5p	miRNA	4033	4312.333	4281	4462.667	4305	4280	4603	2134	3960	5660	0.216707014	3.11E-34
hsa-miR-548j-5p	hsa-miR-548j-5p	miRNA	1257.667	1280	1145.333	1164	1660	1447	569	486	1420	1627	0.030216911	0.369683762
hsa-miR-4726-5p	hsa-miR-4726-5p	miRNA	20.333	20.333	2.667	2.667	0	0	6	57	2	4	-2.763467675	1.87E-10
hsa-miR-490-3p	hsa-miR-490-3p	miRNA	3	3	2.667	2.667	0	6	1	9	1	0	-0.002655339	0.996972617
hsa-miR-548ay-5p	hsa-miR-548ay-5p	miRNA	23	23	16.667	16.667	14	8	14	15	28	40	-0.297398604	0.263536427
hsa-miR-141-3p	hsa-miR-141-3p	miRNA	3.667	4	3.333	3.333	2	0	0	0	10	9	-0.095764743	0.876442438
hsa-miR-425-3p	hsa-miR-425-3p	miRNA	8080.667	8706.667	9109.333	9731	7523	12708	7927	9219	6693	7500	0.327737242	1.72E-157
hsa-miR-4474-3p	hsa-miR-4474-3p	miRNA	1.333	1.333	1	1	2	0	0	0	3	2	-0.247767837	0.821036625
hsa-miR-374a-3p	hsa-miR-374a-3p	miRNA	26.333	26.667	22.333	22.333	7	7	25	0	35	72	-0.088569242	0.710079478
hsa-miR-339-5p	hsa-miR-339-5p	miRNA	635	652.333	689	700.667	402	1032	218	1310	817	193	0.270388576	2.32E-09
hsa-let-7a-3p	hsa-let-7a-3p	miRNA	107	107.667	113.667	116	70	140	110	131	91	120	0.274822804	0.013569231
hsa-miR-146a-5p	hsa-miR-146a-5p	miRNA	80414.333	179272.667	94542.333	208162	68182	125924	103791	119297	53912	53764	0.382820851	0
hsa-miR-8485	hsa-miR-8485	miRNA	0	0	2.333	2.333	0	7	0	0	0	0	3.974624585	0.007658025
hsa-miR-29b-2-5p	hsa-miR-29b-2-5p	miRNA	1.333	1.333	5	5	0	12	1	2	2	2	2.074160258	0.00462936
hsa-miR-10a-5p	hsa-miR-10a-5p	miRNA	2445.333	2531.333	1756	1788.667	3680	1267	1375	241	2626	3415	-0.333743282	4.13E-39
hsa-miR-499a-5p	hsa-miR-499a-5p	miRNA	168.667	175	144.333	146.667	147	102	96	13	235	346	-0.087544236	0.346457975
hsa-miR-3146	hsa-miR-3146	miRNA	10.333	10.333	4.333	4.333	3	7	0	24	6	4	-1.08648693	0.016942409
hsa-miR-6516-5p	hsa-miR-6516-5p	miRNA	26.333	26.333	18.667	18.667	17	11	24	29	21	33	-0.329156163	0.187893515
hsa-miR-6796-5p	hsa-miR-6796-5p	miRNA	0	0	0.333	0.333	0	0	0	0	1	0
hsa-miR-675-3p	hsa-miR-675-3p	miRNA	0.333	0.333	0.667	0.667	0	0	0	0	2	1	1.167269663	0.495914409
hsa-miR-144-3p	hsa-miR-144-3p	miRNA	22	22	26.333	26.667	19	35	16	7	28	40	0.444803638	0.062891613
hsa-miR-2110	hsa-miR-2110	miRNA	654	661.667	674.333	679	584	721	904	1112	398	266	0.204576636	6.78E-06
hsa-miR-4659a-3p	hsa-miR-4659a-3p	miRNA	65	65.667	75.333	76.667	70	93	45	44	88	81	0.390707894	0.005169669
hsa-miR-1306-5p	hsa-miR-1306-5p	miRNA	85	85.667	87	87.667	78	55	46	34	160	143	0.200564103	0.112655845
hsa-miR-6763-5p	hsa-miR-6763-5p	miRNA	0.333	0.333	3	3.333	0	9	0	0	0	1	3.489197758	0.002336939
hsa-miR-6809-5p	hsa-miR-6809-5p	miRNA	0	0	6.333	6.333	0	15	3	0	1	0	5.415197176	3.11E-06
hsa-miR-23a-3p	hsa-miR-23a-3p	miRNA	64210.333	121808.333	59562.667	90523.333	67358	45739	53298	19502	79651	105771	-0.260981559	0
hsa-miR-4723-3p	hsa-miR-4723-3p	miRNA	0	0	2	2	0	0	0	0	6	0	3.752232163	0.01541853
hsa-miR-6788-3p	hsa-miR-6788-3p	miRNA	0.667	0.667	1.667	1.667	0	0	0	0	5	2	1.489197758	0.19392504
hsa-miR-4800-3p	hsa-miR-4800-3p	miRNA	0	0	1.333	1.333	0	0	4	0	0	0
hsa-miR-4676-5p	hsa-miR-4676-5p	miRNA	10.333	10.667	3.333	3.333	0	0	0	23	10	8	-1.510802242	0.001721379
hsa-miR-337-5p	hsa-miR-337-5p	miRNA	6	6	4.333	4.333	10	0	0	0	13	8	-0.302215621	0.562033291
hsa-miR-6513-3p	hsa-miR-6513-3p	miRNA	21.333	21.667	24.667	24.667	10	10	23	8	41	46	0.354355215	0.147726557
hsa-miR-320d	hsa-miR-320d	miRNA	15.333	15.667	16.333	16.333	18	5	24	24	20	4	0.227390655	0.439688414
hsa-miR-374a-5p	hsa-miR-374a-5p	miRNA	20	20	10.667	10.667	6	0	0	12	32	42	-0.739620933	0.016321194
hsa-miR-548ax	hsa-miR-548ax	miRNA	123.667	125	117.333	117.333	90	148	56	64	148	217	0.075954496	0.477583995
hsa-miR-95-3p	hsa-miR-95-3p	miRNA	1.333	1.333	1.333	1.333	1	0	0	0	4	3	0.167269663	0.869648321
hsa-miR-28-3p	hsa-miR-28-3p	miRNA	16300.667	18229.333	13538.333	14855.667	18627	19089	6042	11758	15484	18517	-0.127978789	2.39E-44
hsa-miR-580-3p	hsa-miR-580-3p	miRNA	0.333	0.333	0	0	0	0	0	0	0	1
hsa-miR-548aw	hsa-miR-548aw	miRNA	0	0	2.667	2.667	0	8	0	0	0	0	4.167269663	0.003840696
hsa-miR-6771-3p	hsa-miR-6771-3p	miRNA	0.333	0.333	0	0	0	0	0	0	0	1
hsa-miR-3065-5p	hsa-miR-3065-5p	miRNA	3	3	5.333	5.667	0	14	1	0	1	9	1.084807503	0.061269242
hsa-miR-6783-5p	hsa-miR-6783-5p	miRNA	2.333	2.333	5.667	5.667	2	0	11	0	6	5	1.447377582	0.0190268
hsa-miR-3944-3p	hsa-miR-3944-3p	miRNA	0.333	0.333	0	0	0	0	0	0	0	1
hsa-miR-6786-3p	hsa-miR-6786-3p	miRNA	0.667	0.667	3	3	1	9	0	0	0	1	2.337194664	0.018201103
hsa-miR-299-5p	hsa-miR-299-5p	miRNA	2	2	3.333	3.333	4	10	0	0	0	2	0.904235257	0.217013053
hsa-miR-376a-3p	hsa-miR-376a-3p	miRNA	1194	1209.333	1200	1211.667	1554	1859	637	566	1104	1462	0.170050571	4.97E-07
hsa-miR-5000-5p	hsa-miR-5000-5p	miRNA	0.333	0.333	0	0	0	0	0	0	0	1
hsa-miR-1307-3p	hsa-miR-1307-3p	miRNA	13041.667	14359.667	12418.333	13410	11115	13735	11482	16429	12038	11581	0.06855664	6.41E-12
hsa-miR-363-5p	hsa-miR-363-5p	miRNA	2	2	3	3	4	0	8	0	1	2	0.752232163	0.31717058
hsa-miR-190b-5p	hsa-miR-190b-5p	miRNA	84.667	85.333	73.333	73.333	100	52	136	121	32	33	-0.051370624	0.697865914
hsa-miR-7108-5p	hsa-miR-7108-5p	miRNA	1	1	0	0	2	0	0	0	0	1
hsa-miR-503-3p	hsa-miR-503-3p	miRNA	0.667	0.667	7.667	7.667	0	20	0	0	3	2	3.690831619	2.42E-06
hsa-miR-4742-3p	hsa-miR-4742-3p	miRNA	3	3.333	4	4	1	5	6	0	1	8	0.430304069	0.484784482
hsa-miR-7849-3p	hsa-miR-7849-3p	miRNA	47.667	48.333	17.333	17.333	53	8	27	66	17	24	-1.312199709	2.00E-09
hsa-miR-6868-3p	hsa-miR-6868-3p	miRNA	0	0	0.667	0.667	0	0	2	0	0	0
hsa-miR-6807-5p	hsa-miR-6807-5p	miRNA	0	0	0.333	0.333	0	1	0	0	0	0
hsa-miR-6735-5p	hsa-miR-6735-5p	miRNA	0.333	0.333	0	0	0	0	0	0	0	1
hsa-miR-30a-5p	hsa-miR-30a-5p	miRNA	21	21.667	25	25.333	37	33	12	0	30	26	0.392829363	0.106198618
hsa-miR-4470	hsa-miR-4470	miRNA	1.667	1.667	6.333	6.333	5	0	9	0	10	0	2.093269081	0.001347055
hsa-miR-7110-5p	hsa-miR-7110-5p	miRNA	0.333	0.333	0	0	0	0	0	0	0	1
hsa-miR-4716-3p	hsa-miR-4716-3p	miRNA	0.333	0.333	0	0	0	0	0	0	0	1
hsa-miR-4725-3p	hsa-miR-4725-3p	miRNA	1.333	1.333	0	0	4	0	0	0	0	0
hsa-miR-30d-5p	hsa-miR-30d-5p	miRNA	2408.333	2509	2801.667	2872.667	3382	4248	1843	1388	2314	2455	0.36254779	2.26E-57
hsa-miR-4747-5p	hsa-miR-4747-5p	miRNA	0.333	0.333	0	0	1	0	0	0	0	0
hsa-miR-3667-3p	hsa-miR-3667-3p	miRNA	5.333	5.333	8.333	8.333	2	17	2	0	6	14	0.811125853	0.075170814
hsa-miR-6813-3p	hsa-miR-6813-3p	miRNA	1.667	1.667	3.667	3.667	2	2	0	0	9	3	1.304773186	0.08133113
hsa-miR-605-3p	hsa-miR-605-3p	miRNA	2	2	2.667	2.667	4	3	0	0	5	2	0.582307162	0.452134537
hsa-miR-452-5p	hsa-miR-452-5p	miRNA	3.333	3.333	5	5	1	10	0	0	5	9	0.752232163	0.19657611
hsa-miR-194-5p	hsa-miR-194-5p	miRNA	153.333	157	154.333	156.667	134	162	91	85	210	241	0.16420336	0.080602383
hsa-miR-3150b-3p	hsa-miR-3150b-3p	miRNA	15.333	15.667	9.333	9.333	12	1	25	30	2	4	-0.579964267	0.086615726
hsa-miR-487a-3p	hsa-miR-487a-3p	miRNA	45	46	36.667	36.667	54	35	30	16	45	65	-0.159895081	0.383960412
hsa-miR-642a-5p	hsa-miR-642a-5p	miRNA	5.333	5.333	2	2	5	0	6	11	0	0	-1.247767837	0.055375566
hsa-miR-424-5p	hsa-miR-424-5p	miRNA	282	285.333	239.667	240.333	249	225	235	124	259	473	-0.080341874	0.269305866
hsa-miR-3678-3p	hsa-miR-3678-3p	miRNA	0	0	1.333	1.333	0	0	0	0	4	0
hsa-miR-656-5p	hsa-miR-656-5p	miRNA	4.333	4.667	1	1	7	0	0	0	3	6	-2.055122759	0.010275856
hsa-miR-3121-3p	hsa-miR-3121-3p	miRNA	1.333	1.333	4.333	4.333	4	0	8	0	5	0	1.867709381	0.013882683
hsa-miR-4687-5p	hsa-miR-4687-5p	miRNA	2.333	2.333	4	4	5	0	6	0	6	2	0.944877241	0.160556348
hsa-miR-4717-5p	hsa-miR-4717-5p	miRNA	3	3	1	1	8	0	0	0	3	1	-1.417692838	0.112909104
hsa-miR-3939	hsa-miR-3939	miRNA	7.667	7.667	8.333	8.333	12	11	0	0	14	11	0.287563896	0.489716785
hsa-miR-548az-5p	hsa-miR-548az-5p	miRNA	0	0	0.333	0.333	0	0	0	0	1	0
hsa-miR-3177-3p	hsa-miR-3177-3p	miRNA	12	12	15.667	15.667	27	5	31	0	11	9	0.551933513	0.082484123
hsa-miR-4488	hsa-miR-4488	miRNA	5.333	5.333	3	3	16	0	0	0	9	0	-0.662805336	0.260040939
hsa-miR-3691-5p	hsa-miR-3691-5p	miRNA	5.667	5.667	1.667	1.667	0	0	5	17	0	0	-1.598265084	0.017286431
hsa-miR-10527-5p	hsa-miR-10527-5p	miRNA	67.333	67.667	107	107.333	84	66	184	16	71	102	0.832850624	6.47E-11
hsa-miR-3688-5p	hsa-miR-3688-5p	miRNA	0	0	0.333	0.333	0	0	0	0	1	0
hsa-miR-532-3p	hsa-miR-532-3p	miRNA	81	81	99	100	79	112	44	120	141	44	0.47127585	1.45E-04
hsa-miR-574-3p	hsa-miR-574-3p	miRNA	3280.667	3406.667	3417.667	3502.333	3211	4037	2014	1578	4202	5053	0.207225271	4.14E-25
hsa-miR-23a-5p	hsa-miR-23a-5p	miRNA	20.333	20.333	17.667	17.667	29	19	18	24	16	8	-0.03554722	0.895390037
hsa-miR-329-5p	hsa-miR-329-5p	miRNA	1.333	1.333	4.333	4.333	3	1	8	0	4	1	1.867709381	0.013882683
hsa-miR-4479	hsa-miR-4479	miRNA	2	2	10.333	10.333	1	17	0	0	14	5	2.536503472	4.33E-06
hsa-miR-4326	hsa-miR-4326	miRNA	10.667	11	16.667	17	2	34	10	26	6	4	0.795300885	0.012462135
hsa-let-7b-5p	hsa-let-7b-5p	miRNA	31529.333	39540.333	36487.333	47146.333	33178	40248	47014	38569	22200	22841	0.421090203	0
hsa-miR-6842-3p	hsa-miR-6842-3p	miRNA	175.667	179	182	184	169	231	184	227	131	131	0.207015842	0.017810197
hsa-miR-6827-3p	hsa-miR-6827-3p	miRNA	0	0	0.333	0.333	0	1	0	0	0	0
hsa-miR-5189-3p	hsa-miR-5189-3p	miRNA	25.333	25.667	46.333	46.667	59	43	0	0	96	17	1.029766139	2.64E-07
hsa-miR-221-5p	hsa-miR-221-5p	miRNA	6.667	6.667	11.333	11.667	4	18	0	0	16	16	0.974624585	0.013926129
hsa-miR-550a-3p	hsa-miR-550a-3p	miRNA	0.667	0.667	9	9	2	23	0	0	4	0	3.922157165	1.83E-07
hsa-miR-3187-3p	hsa-miR-3187-3p	miRNA	349.667	354.333	331.333	333.333	341	393	374	525	227	183	0.079128066	0.212622831
hsa-miR-548ay-3p	hsa-miR-548ay-3p	miRNA	0.333	0.333	0	0	1	0	0	0	0	0
hsa-miR-619-5p	hsa-miR-619-5p	miRNA	0.667	0.667	0.333	0.333	2	1	0	0	0	0	-0.832730337	0.627125208
hsa-miR-548au-5p	hsa-miR-548au-5p	miRNA	0.667	0.667	0	0	0	0	0	0	0	2
hsa-miR-454-5p	hsa-miR-454-5p	miRNA	12.667	12.667	6.333	6.333	10	8	3	6	8	22	-0.832730337	0.034221256
hsa-miR-494-3p	hsa-miR-494-3p	miRNA	1	1	0	0	0	0	0	0	0	3
hsa-miR-5581-3p	hsa-miR-5581-3p	miRNA	60.667	61	59.333	59.667	82	55	53	15	70	85	0.135385602	0.371609898
hsa-miR-4660	hsa-miR-4660	miRNA	1.333	1.333	5	5.333	4	0	15	0	0	0	2.167269663	0.002638412
hsa-miR-99b-5p	hsa-miR-99b-5p	miRNA	13497.667	15180	15006.667	16791.667	15394	17784	19111	16595	8125	8504	0.312843305	5.33E-248
hsa-miR-92b-3p	hsa-miR-92b-3p	miRNA	859	890.667	764.333	776.667	1530	629	557	52	1107	995	-0.03032039	0.457479861
hsa-miR-6876-5p	hsa-miR-6876-5p	miRNA	5.667	5.667	6	6	14	8	0	0	10	3	0.249731823	0.608395453
hsa-miR-603	hsa-miR-603	miRNA	0.333	0.333	0	0	0	0	0	0	0	1
hsa-miR-32-5p	hsa-miR-32-5p	miRNA	27.667	27.667	20.667	20.667	4	0	3	0	59	79	-0.253573458	0.292097701
hsa-miR-5706	hsa-miR-5706	miRNA	1.333	1.333	0	0	4	0	0	0	0	0
hsa-miR-1301-3p	hsa-miR-1301-3p	miRNA	264.333	272.333	303.333	308.667	234	233	311	208	366	351	0.347945778	4.81E-07
hsa-miR-7112-3p	hsa-miR-7112-3p	miRNA	1.333	1.333	2.667	2.667	2	3	3	0	2	2	1.167269663	0.173240645
hsa-miR-370-3p	hsa-miR-370-3p	miRNA	108.667	110	73	73	51	125	49	254	45	21	-0.424265492	6.44E-04
hsa-miR-148a-5p	hsa-miR-148a-5p	miRNA	1.667	1.667	4	4	4	10	2	0	0	1	1.430304069	0.050852009
hsa-miR-4781-3p	hsa-miR-4781-3p	miRNA	0.333	0.333	0	0	0	0	0	0	0	1
hsa-miR-7976	hsa-miR-7976	miRNA	2.667	2.667	2	2	0	5	0	8	1	0	-0.247767837	0.749035077
hsa-miR-3200-5p	hsa-miR-3200-5p	miRNA	1.333	1.667	0	0	0	0	0	0	0	4	-3.154658432	0.051671067
hsa-miR-11401	hsa-miR-11401	miRNA	4.333	4.667	0.333	0.333	11	0	1	0	0	2	-3.640085259	5.52E-04
hsa-miR-1255a	hsa-miR-1255a	miRNA	5.667	5.667	5.333	5.333	0	0	0	0	16	17	0.079806821	0.873680276
hsa-miR-6895-3p	hsa-miR-6895-3p	miRNA	0	0	6	6	0	0	14	0	4	0	5.337194664	5.77E-06
hsa-miR-615-3p	hsa-miR-615-3p	miRNA	0.667	0.667	0	0	2	0	0	0	0	0
hsa-miR-4440	hsa-miR-4440	miRNA	0	0	2.667	2.667	0	8	0	0	0	0	4.167269663	0.003840696
hsa-miR-6873-5p	hsa-miR-6873-5p	miRNA	0.333	0.333	0	0	0	0	0	0	0	1
hsa-miR-548b-3p	hsa-miR-548b-3p	miRNA	0.333	0.333	0	0	1	0	0	0	0	0
hsa-miR-17-5p	hsa-miR-17-5p	miRNA	500.333	510	450.333	454	440	488	153	107	710	954	-5.35E-04	0.99203968
hsa-miR-25-5p	hsa-miR-25-5p	miRNA	7.333	7.333	12.333	12.667	4	24	13	11	0	7	0.955765558	0.011701101
hsa-miR-579-5p	hsa-miR-579-5p	miRNA	62	64.333	82.333	82.333	31	133	82	108	32	47	0.523179857	1.49E-04
hsa-miR-1306-3p	hsa-miR-1306-3p	miRNA	11.333	11.333	12.333	12.333	10	4	20	19	13	5	0.289260187	0.39808073
hsa-miR-103a-1-5p	hsa-miR-103a-1-5p	miRNA	0.667	0.667	0.333	0.333	1	1	0	0	0	1	-0.832730337	0.627125208
hsa-miR-4750-5p	hsa-miR-4750-5p	miRNA	0	0	1.333	1.333	0	0	0	0	4	0
hsa-miR-4750-3p	hsa-miR-4750-3p	miRNA	0	0	0.667	0.667	0	0	0	0	2	0
hsa-miR-191-3p	hsa-miR-191-3p	miRNA	34.333	34.333	31.333	31.667	33	18	33	23	43	47	0.050624744	0.804915917
hsa-miR-302a-3p	hsa-miR-302a-3p	miRNA	0.333	0.333	1	1	0	0	0	1	3	0	1.752232163	0.257962454
hsa-miR-4665-5p	hsa-miR-4665-5p	miRNA	33	33	30	30	20	40	26	72	24	7	0.029766139	0.887188437
hsa-miR-3928-3p	hsa-miR-3928-3p	miRNA	0.667	0.667	9.333	9.333	2	13	14	0	1	0	3.974624585	9.63E-08
hsa-miR-6787-3p	hsa-miR-6787-3p	miRNA	0	0	0.333	0.667	0	1	0	0	0	0
hsa-miR-7977	hsa-miR-7977	miRNA	0	0	0.333	0.333	0	0	1	0	0	0
hsa-miR-27a-3p	hsa-miR-27a-3p	miRNA	13056.333	15186.333	12254.333	13335.667	7161	10778	9737	5605	16248	26403	-0.020213969	0.040222694
hsa-miR-3529-5p	hsa-miR-3529-5p	miRNA	5	5	0	0	0	0	0	15	0	0	-4.739620933	1.19E-04
hsa-miR-26b-3p	hsa-miR-26b-3p	miRNA	66.333	67.667	74.667	77	52	58	66	76	100	71	0.353682787	0.010676692
hsa-miR-4732-5p	hsa-miR-4732-5p	miRNA	2.333	2.333	2.333	2.333	0	0	7	0	0	7	0.167269663	0.828137579
hsa-miR-605-5p	hsa-miR-605-5p	miRNA	1.667	1.667	1.333	1.333	3	0	3	0	1	2	-0.154658432	0.872536331
hsa-miR-4646-3p	hsa-miR-4646-3p	miRNA	0	0	0.333	0.333	0	1	0	0	0	0
hsa-miR-1292-5p	hsa-miR-1292-5p	miRNA	40	42.667	52.667	53	30	64	71	68	23	22	0.480152618	0.004904376
hsa-miR-4641	hsa-miR-4641	miRNA	0.333	0.333	3	3.333	0	0	9	0	0	1	3.489197758	0.002336939
hsa-miR-151a-3p	hsa-miR-151a-3p	miRNA	1448	1489.333	2224	2276	898	2075	1151	1528	3446	1918	0.779103535	1.60E-177
hsa-miR-5187-5p	hsa-miR-5187-5p	miRNA	77	77	41.667	41.667	30	20	92	182	13	19	-0.718695094	4.31E-06
hsa-miR-370-5p	hsa-miR-370-5p	miRNA	5	5.667	2.333	2.333	8	0	5	5	2	2	-1.112838256	0.071389296
hsa-miR-12136	hsa-miR-12136	miRNA	897.667	927.333	910.667	926.667	723	1383	916	1715	433	255	0.166232126	1.70E-05
hsa-miR-3677-3p	hsa-miR-3677-3p	miRNA	1	1	2.333	2.333	2	6	0	0	1	1	1.389662084	0.144487503
hsa-let-7c-3p	hsa-let-7c-3p	miRNA	0	0	0.333	0.333	0	0	0	0	1	0
hsa-miR-1537-3p	hsa-miR-1537-3p	miRNA	38	38.333	34.667	34.667	26	33	39	45	32	43	0.02221933	0.909251221
hsa-miR-3155b	hsa-miR-3155b	miRNA	1.333	1.333	1	1	4	0	0	0	3	0	-0.247767837	0.821036625
hsa-miR-215-5p	hsa-miR-215-5p	miRNA	0.333	0.333	0	0	0	0	0	0	0	1
hsa-miR-760	hsa-miR-760	miRNA	14	14.333	34	34	24	23	62	5	17	13	1.41343025	1.68E-08
hsa-miR-3614-5p	hsa-miR-3614-5p	miRNA	4.333	4.333	0.667	0.667	2	0	0	11	2	0	-2.533170055	0.00501655
hsa-miR-3613-5p	hsa-miR-3613-5p	miRNA	775.333	783.333	771.667	776.667	434	480	798	501	1037	1391	0.154938861	2.36E-04
hsa-miR-5584-5p	hsa-miR-5584-5p	miRNA	0.333	0.333	2	2	0	0	5	0	1	1	2.752232163	0.034601371
hsa-miR-11400	hsa-miR-11400	miRNA	274.333	278.333	416	427.333	1	4	1242	821	2	1	0.785817822	2.63E-35
hsa-miR-885-5p	hsa-miR-885-5p	miRNA	7.667	7.667	30.333	31	3	82	0	0	9	20	2.182866518	3.29E-13
hsa-miR-3124-5p	hsa-miR-3124-5p	miRNA	24	24	55.667	55.667	27	87	52	7	28	38	1.381048954	1.30E-12
hsa-miR-671-5p	hsa-miR-671-5p	miRNA	425.667	431	192.333	192.667	175	229	203	1002	145	100	-0.994311215	1.21E-46
hsa-miR-4533	hsa-miR-4533	miRNA	22.667	23	17.333	17.667	30	34	0	26	18	12	-0.213334339	0.415759267
hsa-let-7f-2-3p	hsa-let-7f-2-3p	miRNA	0.333	0.333	0	0	0	0	0	0	0	1
hsa-miR-5189-5p	hsa-miR-5189-5p	miRNA	0	0	0.667	0.667	0	0	0	0	2	0
hsa-let-7f-1-3p	hsa-let-7f-1-3p	miRNA	1.667	1.667	2.333	2.333	1	1	1	2	5	2	0.65269649	0.436121244
hsa-miR-660-5p	hsa-miR-660-5p	miRNA	49	50	63.667	64.333	33	48	79	64	64	50	0.53090801	6.81E-04
hsa-miR-6852-5p	hsa-miR-6852-5p	miRNA	675.667	685.667	638	643	558	815	635	909	464	560	0.074581012	0.102480982
hsa-miR-377-5p	hsa-miR-377-5p	miRNA	36.667	37.667	34.667	35	30	48	38	58	18	22	0.061336218	0.753504103
hsa-let-7e-5p	hsa-let-7e-5p	miRNA	3952.667	4131	5149.667	5418.667	6637	3822	9357	2923	2270	2298	0.558716504	4.71E-234
hsa-miR-92a-3p	hsa-miR-92a-3p	miRNA	99595	351940.333	106207.333	264951.667	125290	92103	83428	17865	143091	155630	-0.242331995	0
hsa-miR-337-3p	hsa-miR-337-3p	miRNA	1419.333	1483	1565.333	1592.333	2007	1511	1270	268	1915	1983	0.269893441	2.46E-19
hsa-miR-548at-3p	hsa-miR-548at-3p	miRNA	0	0	2	2	0	6	0	0	0	0	3.752232163	0.01541853
hsa-miR-3127-3p	hsa-miR-3127-3p	miRNA	1.667	1.667	6	6	2	12	3	0	3	3	2.015266569	0.002327829
hsa-miR-3617-3p	hsa-miR-3617-3p	miRNA	4.333	5	6.333	6.333	4	1	1	0	17	9	0.508306581	0.305598789
hsa-miR-766-3p	hsa-miR-766-3p	miRNA	2374	2456.667	2973	3040.333	3178	3806	2076	2021	3037	1923	0.474797049	8.95E-99
hsa-miR-7113-5p	hsa-miR-7113-5p	miRNA	0	0	1	1	0	0	0	0	3	0
hsa-miR-6817-3p	hsa-miR-6817-3p	miRNA	2.667	2.667	3.667	3.667	4	7	0	0	4	4	0.626701281	0.346408505
hsa-miR-487b-3p	hsa-miR-487b-3p	miRNA	1757.667	1793.333	2050.333	2085.667	2432	2449	2069	828	1633	2013	0.385134594	5.73E-47
hsa-miR-330-3p	hsa-miR-330-3p	miRNA	67.333	68	56	57.333	66	83	63	79	22	57	-0.078890925	0.596350134
hsa-miR-127-3p	hsa-miR-127-3p	miRNA	28093.667	36127	25695.667	31016.333	25417	38178	25851	44983	13058	13881	-0.05277965	1.88E-16
hsa-miR-1226-3p	hsa-miR-1226-3p	miRNA	80	80.667	64	64.667	74	25	46	47	121	119	-0.151680732	0.273407795
hsa-miR-23b-3p	hsa-miR-23b-3p	miRNA	3413	3657	3210.333	3303.667	3367	3666	1980	673	3985	6199	0.020677165	0.300165002
hsa-miR-5004-3p	hsa-miR-5004-3p	miRNA	5.667	6	12.333	12.333	6	20	8	2	9	9	1.206798027	0.002635683
hsa-miR-92b-5p	hsa-miR-92b-5p	miRNA	8.667	8.667	5.333	5.333	3	1	11	19	4	4	-0.533170055	0.23753295
hsa-miR-6829-3p	hsa-miR-6829-3p	miRNA	0.667	0.667	0.333	0.333	0	0	1	0	0	2	-0.832730337	0.627125208
hsa-miR-6766-3p	hsa-miR-6766-3p	miRNA	0	0	1.333	1.333	0	2	2	0	0	0
hsa-miR-3177-5p	hsa-miR-3177-5p	miRNA	2	2.333	7.667	7.667	0	0	18	0	5	6	1.883476697	9.98E-04
hsa-miR-301b-3p	hsa-miR-301b-3p	miRNA	10	10	24.667	24.667	10	26	10	0	38	20	1.469832433	7.45E-07
hsa-miR-129-2-3p	hsa-miR-129-2-3p	miRNA	0	0	1	1	0	0	3	0	0	0
hsa-miR-5586-3p	hsa-miR-5586-3p	miRNA	1	1	2.333	2.333	0	4	0	0	3	3	1.389662084	0.144487503
hsa-miR-490-5p	hsa-miR-490-5p	miRNA	746.667	759.667	628.667	635	407	983	837	1772	66	61	-0.091340264	0.040817221
hsa-miR-942-5p	hsa-miR-942-5p	miRNA	583.667	587.667	639	642.333	505	666	831	815	420	431	0.29559376	4.80E-10
hsa-miR-27b-5p	hsa-miR-27b-5p	miRNA	89.333	90.667	75.333	76	107	94	71	59	61	102	-0.087303164	0.499151704
hsa-miR-4754	hsa-miR-4754	miRNA	2.667	2.667	1.667	1.667	7	0	3	0	2	1	-0.510802242	0.528597328
hsa-miR-1269b	hsa-miR-1269b	miRNA	0	0	0.667	0.667	0	2	0	0	0	0
hsa-miR-6756-3p	hsa-miR-6756-3p	miRNA	0.333	0.333	0	0	0	0	0	0	0	1
hsa-miR-345-5p	hsa-miR-345-5p	miRNA	151.333	153.667	182	182.667	150	339	131	225	76	79	0.416678805	4.59E-06
hsa-miR-4762-3p	hsa-miR-4762-3p	miRNA	0.333	0.333	0.333	0.333	0	0	0	0	1	1	0.167269663	0.934604888
hsa-miR-877-5p	hsa-miR-877-5p	miRNA	192	193.667	204	205	285	246	219	130	147	161	0.24931791	0.002788012
hsa-miR-6759-5p	hsa-miR-6759-5p	miRNA	0	0	0.333	0.333	0	1	0	0	0	0
hsa-miR-323a-5p	hsa-miR-323a-5p	miRNA	21.333	21.667	29	29.333	31	17	63	14	7	19	0.604333468	0.00993418
hsa-miR-433-5p	hsa-miR-433-5p	miRNA	2.667	2.667	2.333	2.333	4	5	2	0	0	4	-0.025375415	0.972836136
hsa-miR-6777-3p	hsa-miR-6777-3p	miRNA	5.333	5.333	2.333	2.333	10	0	1	0	6	6	-1.025375415	0.101777011
hsa-miR-4508	hsa-miR-4508	miRNA	0	0	2.333	2.333	0	7	0	0	0	0	3.974624585	0.007658025
hsa-miR-4521	hsa-miR-4521	miRNA	1.667	1.667	1.667	1.667	4	2	0	0	3	1	0.167269663	0.85442517
hsa-miR-1287-5p	hsa-miR-1287-5p	miRNA	327.333	335.333	358.667	364.667	227	654	259	518	163	237	0.288252096	4.65E-06
hsa-miR-486-3p	hsa-miR-486-3p	miRNA	242.333	248.667	283.667	286.667	570	252	284	132	315	25	0.372430692	2.33E-07
hsa-miR-33a-5p	hsa-miR-33a-5p	miRNA	351.667	354.667	253.667	256	111	139	142	144	480	800	-0.303050272	7.83E-06
hsa-miR-154-5p	hsa-miR-154-5p	miRNA	1272.333	1302.667	1395.333	1428.333	992	2299	1206	2002	681	823	0.3001344	4.54E-21
hsa-miR-4525	hsa-miR-4525	miRNA	0	0	3.667	3.667	0	0	11	0	0	0	4.626701281	5.10E-04
hsa-miR-449a	hsa-miR-449a	miRNA	44.333	45.333	68.667	69.667	39	112	55	48	39	46	0.787165954	5.34E-07
hsa-miR-4765	hsa-miR-4765	miRNA	1.667	1.667	4	4	3	6	0	0	6	2	1.430304069	0.050852009
hsa-miR-33b-5p	hsa-miR-33b-5p	miRNA	0	0	1.333	1.333	0	0	3	0	1	0
hsa-miR-106b-3p	hsa-miR-106b-3p	miRNA	10.333	10.667	11.667	11.667	13	17	6	0	12	18	0.29655268	0.400037706
hsa-miR-628-5p	hsa-miR-628-5p	miRNA	11.333	11.333	8	8	2	24	0	23	0	9	-0.335230678	0.379452929
hsa-miR-539-5p	hsa-miR-539-5p	miRNA	6.333	6.333	5.667	6	8	3	5	11	9	0	0.089267151	0.85063358
hsa-miR-4433a-3p	hsa-miR-4433a-3p	miRNA	579	598.333	538	543.333	879	1412	110	22	92	836	0.028157783	0.567801024
hsa-miR-4435	hsa-miR-4435	miRNA	30	30	38	38	59	82	19	1	13	30	0.508306581	0.012089859
hsa-miR-4446-3p	hsa-miR-4446-3p	miRNA	700.333	713	773.333	783.333	1019	678	1015	631	627	451	0.302993937	1.95E-12
hsa-miR-125b-1-3p	hsa-miR-125b-1-3p	miRNA	6.333	6.333	0	0	0	0	0	19	0	0	-5.080657851	1.21E-05
hsa-miR-361-3p	hsa-miR-361-3p	miRNA	18.333	19.667	7.333	7.667	7	13	3	41	6	7	-1.191811431	3.88E-04
hsa-miR-1285-5p	hsa-miR-1285-5p	miRNA	5	5	2.333	2.333	9	0	2	0	5	6	-0.932266011	0.143220318
hsa-miR-523-5p	hsa-miR-523-5p	miRNA	0	0	0.333	0.333	0	0	0	0	1	0
hsa-miR-1468-5p	hsa-miR-1468-5p	miRNA	95.333	95.667	88	88.333	56	95	86	158	83	72	0.052211286	0.670596806
hsa-miR-150-5p	hsa-miR-150-5p	miRNA	6611	7213	7166.667	7764.333	3284	3842	14595	15066	3063	1483	0.273532295	5.10E-90
hsa-miR-6758-3p	hsa-miR-6758-3p	miRNA	0.333	0.333	0.333	0.333	1	0	0	0	1	0	0.167269663	0.934604888
hsa-miR-6843-3p	hsa-miR-6843-3p	miRNA	1.333	1.333	0.333	0.333	2	0	0	0	1	2	-1.832730337	0.203579591
hsa-miR-5010-5p	hsa-miR-5010-5p	miRNA	11	11	11.667	11.667	5	10	17	21	8	7	0.25215856	0.470848707
hsa-miR-378i	hsa-miR-378i	miRNA	0.333	0.333	0	0	0	0	0	1	0	0
hsa-miR-5584-3p	hsa-miR-5584-3p	miRNA	0.667	0.667	0	0	1	0	0	0	0	1
hsa-miR-323b-5p	hsa-miR-323b-5p	miRNA	2.667	2.667	2	2	5	1	4	0	1	3	-0.247767837	0.749035077
hsa-miR-424-3p	hsa-miR-424-3p	miRNA	520	528	482.333	488.667	861	348	620	165	479	534	0.055582431	0.287147561
hsa-miR-375-3p	hsa-miR-375-3p	miRNA	1134.667	1163	977	989.667	1930	1170	1265	478	496	996	-0.065566841	0.068022392
hsa-miR-770-5p	hsa-miR-770-5p	miRNA	1	1	2.333	2.333	3	3	0	0	4	0	1.389662084	0.144487503
hsa-miR-652-5p	hsa-miR-652-5p	miRNA	33.333	33.667	46.333	47	48	93	18	25	28	27	0.648609532	5.09E-04
hsa-miR-3615	hsa-miR-3615	miRNA	324.667	329.667	490.333	493.667	463	680	235	243	556	268	0.749798877	1.73E-37
hsa-miR-4799-5p	hsa-miR-4799-5p	miRNA	19.667	20.333	19	19.333	15	25	9	0	23	44	0.09451332	0.720666785
hsa-miR-3074-5p	hsa-miR-3074-5p	miRNA	6390.667	6802.667	9270.333	9963.333	4991	10005	2539	11025	15267	3156	0.717797756	0
hsa-miR-3691-3p	hsa-miR-3691-3p	miRNA	1	1	0	0	3	0	0	0	0	0
hsa-miR-6514-5p	hsa-miR-6514-5p	miRNA	1.667	2	2.667	2.667	0	0	8	0	0	5	0.582307162	0.452134537
hsa-miR-4741	hsa-miR-4741	miRNA	0	0	0.333	0.333	0	0	0	0	1	0
hsa-miR-6789-5p	hsa-miR-6789-5p	miRNA	0	0	0.667	0.667	0	0	0	0	2	0
hsa-miR-2116-5p	hsa-miR-2116-5p	miRNA	0	0	0.333	0.333	0	0	0	0	1	0
hsa-miR-145-3p	hsa-miR-145-3p	miRNA	3.333	3.333	5.667	5.667	0	13	0	8	4	2	0.932804409	0.098481761
hsa-miR-519a-5p	hsa-miR-519a-5p	miRNA	0	0	0.333	0.333	0	0	0	0	1	0
hsa-miR-576-3p	hsa-miR-576-3p	miRNA	0.333	0.333	1.333	1.333	0	2	0	0	2	1	2.167269663	0.132710441
hsa-miR-522-5p	hsa-miR-522-5p	miRNA	0	0	0.333	0.333	0	0	0	0	1	0
hsa-miR-140-5p	hsa-miR-140-5p	miRNA	872.333	905	1077	1099.333	749	649	700	303	1882	1565	0.447908863	2.79E-33
hsa-miR-133a-3p	hsa-miR-133a-3p	miRNA	168.667	171.333	194	196.667	202	289	167	180	126	124	0.366216258	2.49E-05
hsa-miR-4743-3p	hsa-miR-4743-3p	miRNA	2.333	2.333	0.333	0.333	7	1	0	0	0	0	-2.640085259	0.035158346
hsa-miR-378a-5p	hsa-miR-378a-5p	miRNA	102	103.333	132	132	75	232	110	165	54	66	0.520501878	1.76E-06
hsa-miR-532-5p	hsa-miR-532-5p	miRNA	5644.333	5941.667	5520	5730	5612	5793	4981	4620	5786	6701	0.114937131	8.43E-14
hsa-miR-296-5p	hsa-miR-296-5p	miRNA	37.333	38	36	36.333	18	35	59	89	14	5	0.102563973	0.595283413
hsa-miR-548t-5p	hsa-miR-548t-5p	miRNA	3	3	8.667	8.667	4	20	0	0	6	5	1.697784379	0.001124654
hsa-miR-628-3p	hsa-miR-628-3p	miRNA	248.333	252	245.333	246.333	301	255	215	53	266	391	0.134457793	0.071344735
hsa-miR-29c-3p	hsa-miR-29c-3p	miRNA	30	30.333	25.667	25.667	23	42	0	5	35	62	-0.073738437	0.740687548
hsa-miR-1229-5p	hsa-miR-1229-5p	miRNA	0.333	0.333	0	0	0	0	0	0	0	1
hsa-miR-1236-3p	hsa-miR-1236-3p	miRNA	0.333	0.667	0	0	1	0	0	0	0	0
hsa-miR-1284	hsa-miR-1284	miRNA	55.667	56.667	44.667	45.333	55	22	30	10	82	102	-0.154658432	0.349526366
hsa-miR-6758-5p	hsa-miR-6758-5p	miRNA	0	0	0.667	0.667	0	0	0	0	2	0
hsa-miR-1229-3p	hsa-miR-1229-3p	miRNA	20.667	20.667	33.667	35.667	19	31	11	16	59	27	0.954540339	2.38E-05
hsa-miR-5094	hsa-miR-5094	miRNA	1.333	1.667	3	3	2	9	0	0	0	2	1.015266569	0.197082908
hsa-miR-556-5p	hsa-miR-556-5p	miRNA	1.667	1.667	2.333	2.333	0	0	0	0	7	5	0.65269649	0.436121244
hsa-miR-2355-3p	hsa-miR-2355-3p	miRNA	7.667	8	15	15	4	9	31	7	5	12	1.074160258	0.002522317
hsa-miR-1910-5p	hsa-miR-1910-5p	miRNA	0	0	1	1	0	0	0	0	3	0
hsa-miR-19b-1-5p	hsa-miR-19b-1-5p	miRNA	1	1	0.333	0.333	1	0	0	0	1	2	-1.417692838	0.360062743
hsa-miR-148b-3p	hsa-miR-148b-3p	miRNA	86	87.667	113	114.333	72	94	48	49	197	137	0.55041544	2.88E-06
hsa-miR-6834-3p	hsa-miR-6834-3p	miRNA	0.333	0.333	0	0	0	0	0	0	0	1
hsa-miR-550b-2-5p	hsa-miR-550b-2-5p	miRNA	0.333	0.333	2	2	0	0	6	0	0	1	2.752232163	0.034601371
hsa-miR-378b	hsa-miR-378b	miRNA	0	0	0.333	0.333	0	1	0	0	0	0
hsa-miR-18a-3p	hsa-miR-18a-3p	miRNA	32	32.667	53.333	55.333	32	49	65	38	46	26	0.92759925	2.76E-07
hsa-miR-1271-5p	hsa-miR-1271-5p	miRNA	47.333	47.667	67	67	43	97	44	43	60	56	0.658450017	2.60E-05
hsa-miR-100-5p	hsa-miR-100-5p	miRNA	459.333	468	732.333	747	734	1480	324	360	393	284	0.841869376	9.19E-68
hsa-miR-664a-5p	hsa-miR-664a-5p	miRNA	1.333	1.333	0.333	0.333	4	0	0	0	1	0	-1.832730337	0.203579591
hsa-miR-26a-2-3p	hsa-miR-26a-2-3p	miRNA	5.667	5.667	13	13	4	11	17	3	11	10	1.36520904	6.78E-04
hsa-miR-3605-3p	hsa-miR-3605-3p	miRNA	16.333	18.333	32.667	33.667	17	19	25	0	54	32	1.044121432	9.79E-06
hsa-miR-500a-5p	hsa-miR-500a-5p	miRNA	0	0	2.333	2.333	0	7	0	0	0	0	3.974624585	0.007658025
hsa-miR-6820-3p	hsa-miR-6820-3p	miRNA	0	0	0.333	0.333	0	0	0	0	1	0
hsa-miR-548ab	hsa-miR-548ab	miRNA	0.667	0.667	0	0	0	0	0	0	0	2
hsa-miR-181a-3p	hsa-miR-181a-3p	miRNA	937.667	955	950	962.667	746	1132	698	810	1020	1257	0.178805266	2.54E-06
hsa-miR-744-5p	hsa-miR-744-5p	miRNA	1344	1361.667	1225.333	1237.333	1552	1656	915	894	1105	1586	0.029130295	0.372496441
hsa-miR-590-3p	hsa-miR-590-3p	miRNA	231.667	233.667	114.667	116	46	42	50	0	252	649	-0.843057475	3.89E-20
hsa-let-7d-5p	hsa-let-7d-5p	miRNA	62980.333	105072.333	71196	114546.667	81346	64484	69067	32864	80037	74731	0.291822297	0
hsa-miR-5586-5p	hsa-miR-5586-5p	miRNA	3.333	3.333	0.333	0.333	4	0	0	0	1	6	-3.154658432	0.005925649
hsa-miR-20a-5p	hsa-miR-20a-5p	miRNA	586.667	606	413	418	435	224	232	21	783	1304	-0.368545189	2.14E-12
hsa-miR-6842-5p	hsa-miR-6842-5p	miRNA	46	46	81.333	81.333	87	137	55	30	52	21	0.989482544	4.86E-11
hsa-miR-6802-5p	hsa-miR-6802-5p	miRNA	0	0	1.333	1.333	0	0	0	0	4	0
hsa-let-7f-5p	hsa-let-7f-5p	miRNA	104622	342029.333	116221.667	292119.667	124048	104480	103489	33375	140696	156443	-0.060290908	2.74E-193
hsa-miR-483-5p	hsa-miR-483-5p	miRNA	36	36	91.333	92.333	48	215	7	34	52	26	1.526124327	7.16E-23
hsa-miR-2278	hsa-miR-2278	miRNA	27	27.667	9.333	9.333	10	7	10	62	11	9	-1.400414847	1.84E-06
hsa-miR-21-3p	hsa-miR-21-3p	miRNA	157	158.667	205.667	208	88	283	165	160	169	223	0.557854118	1.67E-10
hsa-miR-4654	hsa-miR-4654	miRNA	3.333	3.333	14.667	14.667	7	0	36	0	8	3	2.304773186	2.24E-07
hsa-miR-3195	hsa-miR-3195	miRNA	0	0	0.667	0.667	0	0	0	0	2	0
hsa-miR-193a-5p	hsa-miR-193a-5p	miRNA	103.333	103.667	134	134.333	197	298	63	67	41	46	0.541134921	5.90E-07
hsa-miR-30e-5p	hsa-miR-30e-5p	miRNA	48.333	50	62.333	62.667	43	49	26	40	112	62	0.493039824	0.00172345
hsa-miR-1299	hsa-miR-1299	miRNA	23.333	23.333	13	13	0	0	0	0	39	70	-0.676611135	0.016433622
hsa-miR-374c-3p	hsa-miR-374c-3p	miRNA	31	31	56	56	0	139	17	66	12	27	1.020428274	2.19E-08
hsa-miR-152-3p	hsa-miR-152-3p	miRNA	161	169.333	157.333	160.333	196	257	44	84	171	203	0.08847806	0.334553647
hsa-miR-361-5p	hsa-miR-361-5p	miRNA	592	598.667	496.667	498.667	768	559	240	36	691	972	-0.096407512	0.055521693
hsa-miR-5695	hsa-miR-5695	miRNA	0.333	0.333	0.333	0.333	0	0	0	0	1	1	0.167269663	0.934604888
hsa-miR-6749-3p	hsa-miR-6749-3p	miRNA	3.333	3.333	3.667	3.667	1	1	4	0	6	9	0.304773186	0.628263386
hsa-miR-511-5p	hsa-miR-511-5p	miRNA	2.333	2.333	1.667	2.333	5	4	0	0	1	2	0.167269663	0.828137579
hsa-miR-378d	hsa-miR-378d	miRNA	0	0	0.667	0.667	0	1	0	0	1	0
hsa-miR-301a-3p	hsa-miR-301a-3p	miRNA	172.667	175.333	121.667	123	85	114	64	26	187	407	-0.34417232	3.95E-04
hsa-miR-6845-3p	hsa-miR-6845-3p	miRNA	0.333	0.333	0	0	0	0	0	0	0	1
hsa-miR-4701-3p	hsa-miR-4701-3p	miRNA	2.333	2.333	2.333	2.333	2	0	3	0	4	5	0.167269663	0.828137579
hsa-miR-16-2-3p	hsa-miR-16-2-3p	miRNA	0.667	0.667	0.667	0.667	0	2	0	0	0	2	0.167269663	0.90762092
hsa-miR-320a-3p	hsa-miR-320a-3p	miRNA	21838	26162	15908	17813.667	20508	9296	24177	34671	14251	10335	-0.387218668	0
hsa-miR-7843-3p	hsa-miR-7843-3p	miRNA	4	4	4.333	4.333	4	2	0	0	11	8	0.28274688	0.624007582
hsa-miR-6732-5p	hsa-miR-6732-5p	miRNA	0.667	0.667	0.667	0.667	0	0	0	0	2	2	0.167269663	0.90762092
hsa-miR-6837-3p	hsa-miR-6837-3p	miRNA	3	3	1.333	1.333	6	4	0	0	0	3	-1.002655339	0.228293852
hsa-miR-4677-3p	hsa-miR-4677-3p	miRNA	0	0	0.333	0.333	0	0	0	0	1	0
hsa-miR-758-3p	hsa-miR-758-3p	miRNA	30.667	30.667	25.333	25.333	40	47	17	28	12	24	-0.10836478	0.626904903
hsa-miR-181a-5p	hsa-miR-181a-5p	miRNA	95174.667	206848.333	97912.667	208285.667	81229	117083	61575	91586	115080	112709	0.177259892	0
hsa-miR-202-5p	hsa-miR-202-5p	miRNA	1.667	1.667	1.667	1.667	0	1	0	0	4	5	0.167269663	0.85442517
hsa-miR-4662a-3p	hsa-miR-4662a-3p	miRNA	0	0	0.333	0.333	0	0	0	0	1	0
hsa-miR-1225-5p	hsa-miR-1225-5p	miRNA	18	18.333	0	0	0	0	0	54	0	0	-6.614090051	1.09E-13
hsa-miR-6743-3p	hsa-miR-6743-3p	miRNA	1.333	1.333	0.667	0.667	1	0	0	1	2	2	-0.832730337	0.492087392
hsa-miR-548ar-3p	hsa-miR-548ar-3p	miRNA	0.333	0.333	0	0	0	0	0	0	0	1
hsa-miR-130b-3p	hsa-miR-130b-3p	miRNA	31.333	31.333	23.333	23.333	42	16	23	35	31	17	-0.258036172	0.254277105
hsa-miR-210-5p	hsa-miR-210-5p	miRNA	1.667	2	6	6	4	0	15	0	3	1	1.752232163	0.005589939
hsa-let-7c-5p	hsa-let-7c-5p	miRNA	843	851.667	1088.333	1096.667	1158	1087	1662	863	516	508	0.532033956	7.28E-45
hsa-miR-6886-5p	hsa-miR-6886-5p	miRNA	0.667	0.667	0	0	2	0	0	0	0	0
hsa-miR-1913	hsa-miR-1913	miRNA	0.667	0.667	0.333	0.333	1	0	0	0	1	1	-0.832730337	0.627125208
hsa-miR-26a-5p	hsa-miR-26a-5p	miRNA	148258.667	1497198.333	166728.667	984149.667	170806	166466	144556	77539	189164	196431	-0.438046046	0
hsa-miR-4529-5p	hsa-miR-4529-5p	miRNA	0	0	0.333	0.333	0	0	0	0	1	0
hsa-miR-6729-3p	hsa-miR-6729-3p	miRNA	0	0	0.333	0.333	0	0	0	0	1	0
hsa-miR-5006-3p	hsa-miR-5006-3p	miRNA	0.333	0.333	0	0	0	0	0	0	0	1
hsa-miR-627-5p	hsa-miR-627-5p	miRNA	1	1	8.667	8.667	0	14	10	0	2	3	3.28274688	1.70E-06
hsa-miR-99b-3p	hsa-miR-99b-3p	miRNA	322.667	335	391.333	401	320	492	582	547	100	101	0.426710804	3.89E-12
hsa-miR-509-3p	hsa-miR-509-3p	miRNA	1.667	2	13	13.333	5	24	5	0	10	0	2.904235257	2.05E-08
hsa-miR-7109-5p	hsa-miR-7109-5p	miRNA	2	2	1.333	1.333	4	0	0	0	4	2	-0.417692838	0.650182917
hsa-miR-548z	hsa-miR-548z	miRNA	0.333	0.333	0	0	0	0	0	0	0	1
hsa-miR-4708-3p	hsa-miR-4708-3p	miRNA	1.333	1.333	5.333	5.333	0	0	16	0	0	4	2.167269663	0.002638412
hsa-miR-6747-3p	hsa-miR-6747-3p	miRNA	4	4	2	2	7	5	0	0	1	5	-0.832730337	0.234083226
hsa-miR-190a-5p	hsa-miR-190a-5p	miRNA	6.667	6.667	7	7	2	4	2	5	15	13	0.237658991	0.597661279
hsa-miR-203a-3p	hsa-miR-203a-3p	miRNA	2	2	3	3	6	0	9	0	0	0	0.752232163	0.31717058
hsa-miR-6849-3p	hsa-miR-6849-3p	miRNA	1	1	1	1	1	1	0	1	2	1	0.167269663	0.886985793
hsa-miR-518e-5p	hsa-miR-518e-5p	miRNA	0	0	0.333	0.333	0	0	0	0	1	0
hsa-miR-6764-5p	hsa-miR-6764-5p	miRNA	18.667	19.333	26.333	26.333	10	31	29	23	19	23	0.613069416	0.013350374
hsa-miR-205-5p	hsa-miR-205-5p	miRNA	1.333	1.333	3.667	3.667	4	8	0	0	3	0	1.626701281	0.039863295
hsa-miR-505-5p	hsa-miR-505-5p	miRNA	22	22.667	21.333	21.333	14	18	32	28	14	24	0.079806821	0.750506534
hsa-miR-4717-3p	hsa-miR-4717-3p	miRNA	4	4	2	2	9	5	0	0	1	3	-0.832730337	0.234083226
hsa-miR-4466	hsa-miR-4466	miRNA	37.333	37.667	56.667	56.667	29	72	77	69	21	14	0.756481636	1.25E-05
hsa-miR-4513	hsa-miR-4513	miRNA	0.667	0.667	1	1	2	0	0	0	3	0	0.752232163	0.56359016
hsa-miR-4729	hsa-miR-4729	miRNA	0	0	0.667	0.667	0	0	0	0	2	0
hsa-miR-135a-3p	hsa-miR-135a-3p	miRNA	1	1	2	2	1	0	0	0	6	2	1.167269663	0.238235265
hsa-miR-320b	hsa-miR-320b	miRNA	228.667	229.333	99.333	100	135	48	121	484	129	67	-1.030176401	4.70E-27
hsa-miR-6871-5p	hsa-miR-6871-5p	miRNA	0.333	0.333	0	0	0	0	0	0	0	1
hsa-miR-656-3p	hsa-miR-656-3p	miRNA	17.333	17.667	11.667	12	17	4	6	3	25	32	-0.39072579	0.205243166
hsa-miR-136-3p	hsa-miR-136-3p	miRNA	31.667	32.333	37.667	38	26	50	15	3	48	66	0.400246835	0.044075734
hsa-miR-335-5p	hsa-miR-335-5p	miRNA	99	99.667	93.333	93.333	140	143	35	24	102	133	0.072551005	0.544925069
hsa-miR-5588-3p	hsa-miR-5588-3p	miRNA	0	0	0.333	0.333	0	0	0	0	1	0
hsa-miR-192-5p	hsa-miR-192-5p	miRNA	754	767	933.333	942.333	554	1043	1038	736	719	972	0.464280562	1.28E-30
hsa-miR-34a-5p	hsa-miR-34a-5p	miRNA	2143.333	2216	2749	2839	2662	3540	3315	2161	1392	1607	0.52469463	1.81E-110
hsa-miR-548l	hsa-miR-548l	miRNA	30.667	30.667	32	32.667	30	42	30	3	24	59	0.258417551	0.216740654
hsa-miR-6515-5p	hsa-miR-6515-5p	miRNA	0.667	0.667	7	7	0	21	0	0	0	2	3.559587086	8.78E-06
hsa-miR-3909	hsa-miR-3909	miRNA	9.333	9.333	9.667	10	11	7	12	4	10	13	0.266805336	0.481062015
hsa-miR-508-5p	hsa-miR-508-5p	miRNA	0.667	1	0.667	0.667	2	0	0	0	2	0	-0.417692838	0.748453948
hsa-miR-3184-3p	hsa-miR-3184-3p	miRNA	21	21	24.333	24.667	54	20	39	3	14	6	0.399443105	0.105425466
hsa-miR-196b-5p	hsa-miR-196b-5p	miRNA	1499.333	1570	2064	2108.333	1271	2005	2246	1024	1941	2203	0.592608083	2.40E-102
hsa-miR-219b-5p	hsa-miR-219b-5p	miRNA	32.333	33.667	47.333	48.667	48	46	57	9	39	40	0.698882739	1.58E-04
hsa-miR-1266-5p	hsa-miR-1266-5p	miRNA	0.333	0.333	0	0	1	0	0	0	0	0
hsa-miR-409-5p	hsa-miR-409-5p	miRNA	1	1	2.333	2.333	0	2	0	0	5	3	1.389662084	0.144487503
hsa-miR-200a-3p	hsa-miR-200a-3p	miRNA	2.333	2.333	3.667	4	2	3	4	0	4	5	0.944877241	0.160556348
hsa-miR-4645-3p	hsa-miR-4645-3p	miRNA	0.333	0.333	7.333	7.333	0	0	17	0	5	1	4.626701281	8.86E-07
hsa-miR-181b-5p	hsa-miR-181b-5p	miRNA	3660	3874.333	3527.333	3672.333	3688	2943	3590	3933	4049	3359	0.090018596	2.62E-06
hsa-miR-4738-3p	hsa-miR-4738-3p	miRNA	3.667	4	1	1	8	0	0	0	3	3	-1.832730337	0.027653815
hsa-miR-423-5p	hsa-miR-423-5p	miRNA	5769.667	6043.333	6875.333	7198	8161	8774	6971	5299	4881	3849	0.419521246	1.83E-184
hsa-miR-548c-5p	hsa-miR-548c-5p	miRNA	1	1	0.333	0.333	0	0	0	0	1	3	-1.417692838	0.360062743
hsa-miR-7704	hsa-miR-7704	miRNA	11	11.333	7.667	8	9	19	0	22	4	2	-0.335230678	0.379452929
hsa-miR-128-1-5p	hsa-miR-128-1-5p	miRNA	1	1	3	3.333	1	7	1	0	1	2	1.904235257	0.028806044
hsa-miR-15b-3p	hsa-miR-15b-3p	miRNA	144	144.333	137.667	138.333	115	105	157	27	151	290	0.106013974	0.284293276
hsa-miR-548aq-3p	hsa-miR-548aq-3p	miRNA	0.333	0.333	1	1	0	3	0	0	0	1	1.752232163	0.257962454
hsa-miR-664b-3p	hsa-miR-664b-3p	miRNA	32.333	32.333	28	28	27	17	13	0	54	70	-0.040325757	0.850922881
hsa-miR-3679-5p	hsa-miR-3679-5p	miRNA	38.667	38.667	21	21	63	28	12	44	23	9	-0.713431409	0.001213136
hsa-miR-1288-3p	hsa-miR-1288-3p	miRNA	3	3	6.667	6.667	7	5	4	0	11	2	1.319272756	0.017767172
hsa-miR-556-3p	hsa-miR-556-3p	miRNA	7	7.333	4.333	4.333	2	2	0	0	11	19	-0.591722238	0.232606564
hsa-miR-548o-5p	hsa-miR-548o-5p	miRNA	1	1	0.333	0.333	0	0	0	0	1	3	-1.417692838	0.360062743
hsa-miR-659-5p	hsa-miR-659-5p	miRNA	0.333	0.333	0	0	0	0	0	0	0	1
hsa-miR-378a-3p	hsa-miR-378a-3p	miRNA	10713.667	12198	8502.667	9085	5683	11749	9981	22478	3778	3980	-0.257816539	4.51E-112
hsa-miR-146b-5p	hsa-miR-146b-5p	miRNA	617.667	638	573.333	579	614	570	682	465	468	774	0.027276587	0.567742657
hsa-miR-6886-3p	hsa-miR-6886-3p	miRNA	0	0	0.333	0.333	0	0	0	0	1	0
hsa-miR-3191-5p	hsa-miR-3191-5p	miRNA	0.667	0.667	6.333	6.333	0	0	3	0	16	2	3.415197176	3.19E-05
hsa-miR-3180-3p	hsa-miR-3180-3p	miRNA	1.333	1.333	0	0	4	0	0	0	0	0
hsa-miR-122b-3p	hsa-miR-122b-3p	miRNA	0	0	0.333	0.333	0	1	0	0	0	0
hsa-miR-6805-5p	hsa-miR-6805-5p	miRNA	0.333	0.333	4.667	4.667	1	14	0	0	0	0	3.974624585	1.62E-04
hsa-let-7e-3p	hsa-let-7e-3p	miRNA	79	80.333	86.333	87.333	100	89	99	44	71	93	0.287803328	0.025223162
hsa-miR-3911	hsa-miR-3911	miRNA	2	2	0	0	5	0	0	0	0	1	-3.417692838	0.027354493
hsa-miR-548n	hsa-miR-548n	miRNA	9.333	9.667	7	7	12	9	2	0	10	16	-0.29839391	0.467138451
hsa-miR-3065-3p	hsa-miR-3065-3p	miRNA	0.333	0.333	3	3	0	0	9	0	0	1	3.337194664	0.004576552
hsa-miR-6505-5p	hsa-miR-6505-5p	miRNA	0.333	0.333	1	1	0	0	0	0	3	1	1.752232163	0.257962454
hsa-miR-6852-3p	hsa-miR-6852-3p	miRNA	12.333	12.667	14.667	14.667	14	21	17	7	6	16	0.378773768	0.234781472
hsa-miR-539-3p	hsa-miR-539-3p	miRNA	1	1	0.333	0.333	2	0	0	0	1	1	-1.417692838	0.360062743
hsa-miR-128-3p	hsa-miR-128-3p	miRNA	2753.333	2839.333	2260.333	2295	2757	2199	1859	581	2723	4922	-0.139788413	1.95E-09
hsa-miR-10399-5p	hsa-miR-10399-5p	miRNA	0.333	0.333	4.333	4.667	0	7	6	0	0	1	3.974624585	1.62E-04
hsa-miR-138-5p	hsa-miR-138-5p	miRNA	16.667	16.667	7.667	7.667	20	2	11	22	10	8	-0.953024571	0.006480694
hsa-miR-133b	hsa-miR-133b	miRNA	1.667	1.667	2	2	0	0	0	0	6	5	0.430304069	0.621302944
hsa-miR-134-5p	hsa-miR-134-5p	miRNA	829	848.667	533.667	543	770	499	824	1460	278	257	-0.476976153	4.59E-26
hsa-miR-182-3p	hsa-miR-182-3p	miRNA	1.667	1.667	1.333	1.333	5	4	0	0	0	0	-0.154658432	0.872536331
hsa-miR-616-5p	hsa-miR-616-5p	miRNA	0	0	0.333	0.333	0	0	0	0	1	0
hsa-miR-625-3p	hsa-miR-625-3p	miRNA	52.333	53	64.333	64.333	60	39	55	0	99	97	0.446843745	0.003717837
hsa-miR-4664-3p	hsa-miR-4664-3p	miRNA	0.333	0.333	0	0	1	0	0	0	0	0
hsa-miR-548q	hsa-miR-548q	miRNA	0.667	0.667	1.667	1.667	2	0	2	0	3	0	1.489197758	0.19392504
hsa-miR-15b-5p	hsa-miR-15b-5p	miRNA	5462.667	5747.333	4310.667	4437	5022	5079	3622	1144	4231	10222	-0.206038509	1.48E-35
hsa-miR-4659b-5p	hsa-miR-4659b-5p	miRNA	6	6	4.333	4.333	3	0	3	0	10	15	-0.302215621	0.562033291
hsa-miR-410-5p	hsa-miR-410-5p	miRNA	1.667	1.667	6.333	6.333	2	15	0	0	4	3	2.093269081	0.001347055
hsa-miR-4728-3p	hsa-miR-4728-3p	miRNA	0	0	0.667	0.667	0	0	0	0	2	0
hsa-miR-3663-5p	hsa-miR-3663-5p	miRNA	0	0	0.333	0.333	0	0	0	0	1	0
hsa-miR-24-3p	hsa-miR-24-3p	miRNA	35744	47331.667	45926	66230	32973	53193	14843	46459	69742	27800	0.651948797	0
hsa-miR-3934-5p	hsa-miR-3934-5p	miRNA	2.333	2.333	0	0	7	0	0	0	0	0	-3.640085259	0.01459294
hsa-miR-1268a	hsa-miR-1268a	miRNA	20.333	20.333	30	30	9	41	42	51	7	1	0.728385422	0.002100766
hsa-miR-1238-3p	hsa-miR-1238-3p	miRNA	0.667	0.667	0	0	1	0	0	0	0	1
hsa-miR-598-3p	hsa-miR-598-3p	miRNA	430.333	438.667	379	382	329	391	241	174	505	788	-0.032282782	0.578912789
hsa-miR-342-5p	hsa-miR-342-5p	miRNA	106.667	109	150.333	152.667	131	130	235	102	86	87	0.653326625	2.89E-10
hsa-miR-26b-5p	hsa-miR-26b-5p	miRNA	16066	18693.333	13009.667	14332	13969	6264	10983	3080	21782	31149	-0.216014237	2.82E-122
hsa-miR-501-5p	hsa-miR-501-5p	miRNA	1	1	9.333	9.667	2	22	6	1	0	0	3.440288157	2.55E-07
hsa-miR-6793-5p	hsa-miR-6793-5p	miRNA	6.667	6.667	1.667	1.667	0	4	0	20	1	0	-1.832730337	0.004469384
hsa-miR-3175	hsa-miR-3175	miRNA	1	1	2.667	2.667	1	7	0	0	1	2	1.582307162	0.085799756
hsa-miR-6772-5p	hsa-miR-6772-5p	miRNA	1	1	0	0	0	0	0	1	0	2
hsa-miR-223-5p	hsa-miR-223-5p	miRNA	2486.667	2636	2729.333	2832.667	2225	3723	2834	3069	1631	2166	0.271080135	2.12E-33
hsa-miR-194-3p	hsa-miR-194-3p	miRNA	0.333	0.333	0	0	0	0	0	0	0	1
hsa-miR-323b-3p	hsa-miR-323b-3p	miRNA	15.333	15.333	7.333	7.667	24	4	7	8	11	14	-0.832730337	0.019821625
hsa-miR-1237-3p	hsa-miR-1237-3p	miRNA	1.333	1.333	2	2	0	2	0	0	4	4	0.752232163	0.414081234
hsa-miR-3158-5p	hsa-miR-3158-5p	miRNA	0.667	0.667	0	0	0	0	0	0	0	2
hsa-miR-125b-2-3p	hsa-miR-125b-2-3p	miRNA	0	0	0.333	0.333	0	0	0	0	1	0
hsa-miR-548am-5p	hsa-miR-548am-5p	miRNA	1	1	0.333	0.333	0	0	0	0	1	3	-1.417692838	0.360062743
hsa-miR-940	hsa-miR-940	miRNA	32	33.333	42	42	35	45	64	49	17	12	0.500693396	0.009262712
hsa-miR-411-3p	hsa-miR-411-3p	miRNA	0.667	0.667	0	0	0	0	0	0	0	2
hsa-miR-6741-5p	hsa-miR-6741-5p	miRNA	12	12	32	32.333	12	34	51	23	11	1	1.597257503	1.71E-09
hsa-miR-5588-5p	hsa-miR-5588-5p	miRNA	1	1	0	0	3	0	0	0	0	0
hsa-miR-301a-5p	hsa-miR-301a-5p	miRNA	0.333	0.333	4.667	4.667	1	9	0	0	5	0	3.974624585	1.62E-04
hsa-miR-96-5p	hsa-miR-96-5p	miRNA	0	0	3.333	3.333	0	0	2	0	8	0	4.489197758	9.91E-04
hsa-miR-4795-5p	hsa-miR-4795-5p	miRNA	0.667	0.667	0	0	0	0	0	0	0	2
hsa-miR-548ap-3p	hsa-miR-548ap-3p	miRNA	16.667	16.667	10	10	21	3	6	0	21	29	-0.569695931	0.082005188
hsa-miR-618	hsa-miR-618	miRNA	0	0	1	1	0	3	0	0	0	0
hsa-miR-340-3p	hsa-miR-340-3p	miRNA	122	125.667	111.667	112.333	117	74	39	7	222	242	0.005453731	0.959717008
hsa-miR-182-5p	hsa-miR-182-5p	miRNA	517.667	527.667	334.333	335	687	345	272	272	386	594	-0.488196091	1.81E-17
hsa-miR-592	hsa-miR-592	miRNA	1.333	1.333	2	2	3	5	0	0	1	1	0.752232163	0.414081234
hsa-miR-3913-5p	hsa-miR-3913-5p	miRNA	0.333	0.333	0	0	0	0	0	0	0	1
hsa-miR-6764-3p	hsa-miR-6764-3p	miRNA	0.667	0.667	0.333	0.333	2	0	0	0	1	0	-0.832730337	0.627125208
hsa-miR-125a-3p	hsa-miR-125a-3p	miRNA	2	2.333	2.333	2.333	5	0	4	0	3	1	0.167269663	0.828137579
hsa-miR-129-5p	hsa-miR-129-5p	miRNA	0.667	0.667	0.333	0.333	1	0	0	0	1	1	-0.832730337	0.627125208
hsa-miR-3158-3p	hsa-miR-3158-3p	miRNA	0	0	0.333	0.333	0	0	0	0	1	0
hsa-miR-195-5p	hsa-miR-195-5p	miRNA	2.667	2.667	8.667	8.667	3	8	0	0	18	5	1.867709381	5.03E-04
hsa-miR-6785-3p	hsa-miR-6785-3p	miRNA	0.333	0.333	0	0	0	0	0	0	0	1
hsa-miR-502-3p	hsa-miR-502-3p	miRNA	16	16	18.333	18.667	3	32	20	37	3	8	0.389662084	0.16872076
hsa-miR-6726-5p	hsa-miR-6726-5p	miRNA	0	0	5.333	5.333	0	7	9	0	0	0	5.167269663	2.02E-05
hsa-miR-3064-5p	hsa-miR-3064-5p	miRNA	18.333	18.333	31	31	13	4	55	19	34	23	0.92506876	1.24E-04
hsa-miR-509-3-5p	hsa-miR-509-3-5p	miRNA	0.333	0.333	5	5	0	14	0	0	1	1	4.074160258	8.39E-05
hsa-miR-6797-3p	hsa-miR-6797-3p	miRNA	0	0	0.333	0.333	0	0	0	0	1	0
hsa-miR-889-5p	hsa-miR-889-5p	miRNA	2	2	14.667	14.667	1	16	21	0	7	5	3.041738781	1.80E-09
hsa-miR-3150a-5p	hsa-miR-3150a-5p	miRNA	1.333	1.333	2	2	2	4	0	0	2	2	0.752232163	0.414081234
hsa-miR-4755-5p	hsa-miR-4755-5p	miRNA	9	9	4	4	12	3	5	8	4	7	-1.002655339	0.036913836
hsa-miR-330-5p	hsa-miR-330-5p	miRNA	2.333	2.667	1.333	1.333	4	2	0	0	2	3	-0.832730337	0.33127231
hsa-miR-338-5p	hsa-miR-338-5p	miRNA	129.667	131.667	149	149	165	129	95	21	223	203	0.345691841	5.09E-04
hsa-miR-1914-5p	hsa-miR-1914-5p	miRNA	0	0	1	1	0	0	2	0	1	0
hsa-miR-139-5p	hsa-miR-139-5p	miRNA	31035	39875.667	38253.667	49727.333	24402	32083	45765	24284	36913	44419	0.485800091	0
hsa-miR-543	hsa-miR-543	miRNA	105.333	107.667	77.333	78	124	57	64	24	111	168	-0.297755972	0.015442538
hsa-miR-151b	hsa-miR-151b	miRNA	383	390	468.333	471.667	413	520	186	175	699	561	0.441563186	7.85E-15
hsa-miR-941	hsa-miR-941	miRNA	103.333	104.333	118	118.333	68	149	102	80	103	162	0.34892603	0.001777789
hsa-miR-3191-3p	hsa-miR-3191-3p	miRNA	24	24	65	66.667	27	47	94	15	54	30	1.641200851	1.15E-18
hsa-miR-6791-3p	hsa-miR-6791-3p	miRNA	31.667	33	17.333	17.333	38	15	1	55	36	2	-0.761647239	0.001552156
hsa-miR-195-3p	hsa-miR-195-3p	miRNA	1.667	1.667	2	2	1	0	0	0	6	4	0.430304069	0.621302944
hsa-miR-6820-5p	hsa-miR-6820-5p	miRNA	7	7	0.333	0.333	3	0	0	16	1	2	-4.22504776	9.13E-06
hsa-miR-1303	hsa-miR-1303	miRNA	7	7	1.333	1.333	9	2	0	8	2	4	-2.22504776	9.52E-04
hsa-miR-6889-3p	hsa-miR-6889-3p	miRNA	1	1.333	0	0	3	0	0	0	0	0
hsa-miR-3187-5p	hsa-miR-3187-5p	miRNA	2.333	2.333	0.333	0.333	7	0	0	0	1	0	-2.640085259	0.035158346
hsa-miR-30c-5p	hsa-miR-30c-5p	miRNA	247	253	275	280	333	358	209	153	258	255	0.313559105	1.38E-05
hsa-miR-1292-3p	hsa-miR-1292-3p	miRNA	0.333	0.333	0.333	0.333	1	1	0	0	0	0	0.167269663	0.934604888
hsa-miR-455-5p	hsa-miR-455-5p	miRNA	0	0	0.333	0.333	0	0	0	0	1	0
hsa-miR-6735-3p	hsa-miR-6735-3p	miRNA	0.667	0.667	0	0	0	0	0	0	0	2
hsa-miR-365a-3p	hsa-miR-365a-3p	miRNA	2.333	2.333	1.333	1.333	4	0	0	0	4	3	-0.640085259	0.470125463
hsa-miR-744-3p	hsa-miR-744-3p	miRNA	71.333	72	52	53	81	58	23	47	75	86	-0.274734884	0.066557029
hsa-miR-6858-3p	hsa-miR-6858-3p	miRNA	2	2	5.333	5.333	3	13	0	0	3	3	1.582307162	0.015115707
hsa-miR-3684	hsa-miR-3684	miRNA	1.667	1.667	2	2	3	0	2	0	4	2	0.430304069	0.621302944
hsa-miR-138-2-3p	hsa-miR-138-2-3p	miRNA	0.667	0.667	0	0	2	0	0	0	0	0
hsa-miR-576-5p	hsa-miR-576-5p	miRNA	487.333	511.667	419	431.333	501	333	304	59	620	902	-0.079131376	0.14502994
hsa-miR-586	hsa-miR-586	miRNA	1	1	0	0	0	0	0	0	0	3
hsa-miR-9-3p	hsa-miR-9-3p	miRNA	24	24.333	9.667	9.667	19	7	7	22	15	31	-1.164573901	1.07E-04
hsa-miR-30b-5p	hsa-miR-30b-5p	miRNA	2564.333	2660.667	2333.333	2387.333	2181	2494	2012	2226	2494	3286	0.010881903	0.642458516
hsa-miR-3913-3p	hsa-miR-3913-3p	miRNA	0.333	0.333	1	1	0	0	0	1	3	0	1.752232163	0.257962454
hsa-miR-6509-5p	hsa-miR-6509-5p	miRNA	1.667	1.667	0	0	4	0	0	0	0	1	-3.154658432	0.051671067
hsa-miR-146a-3p	hsa-miR-146a-3p	miRNA	2	2	4	4	6	8	4	0	0	0	1.167269663	0.095328288
hsa-miR-132-5p	hsa-miR-132-5p	miRNA	46	47	60.333	60.667	59	78	75	36	28	43	0.535512951	8.85E-04
hsa-miR-449c-5p	hsa-miR-449c-5p	miRNA	0.333	0.333	0	0	0	0	0	0	0	1
hsa-miR-4753-3p	hsa-miR-4753-3p	miRNA	1.333	1.333	1.333	1.333	0	0	4	0	0	4	0.167269663	0.869648321
hsa-miR-4714-3p	hsa-miR-4714-3p	miRNA	0	0	2	2	0	0	3	0	3	0	3.752232163	0.01541853
hsa-miR-6884-3p	hsa-miR-6884-3p	miRNA	0.333	0.333	0	0	0	0	0	0	0	1
hsa-miR-376c-3p	hsa-miR-376c-3p	miRNA	1501	1521.667	1481.667	1498.667	1367	2139	1186	1523	1120	1613	0.145296838	1.60E-06
hsa-miR-5090	hsa-miR-5090	miRNA	0.333	0.333	0	0	0	0	0	0	0	1
hsa-miR-491-3p	hsa-miR-491-3p	miRNA	1.333	1.333	1.667	1.667	2	4	0	0	1	2	0.489197758	0.611819523
hsa-miR-411-5p	hsa-miR-411-5p	miRNA	2232.333	2313.667	2431.333	2484.333	2566	2712	1724	934	2858	3197	0.269947393	2.82E-29
hsa-miR-7854-3p	hsa-miR-7854-3p	miRNA	111	113.333	54	54.333	84	70	42	234	50	15	-0.893393119	1.77E-11
hsa-miR-1275	hsa-miR-1275	miRNA	44	44	31	31.333	3	16	66	115	11	14	-0.322535605	0.09494734
hsa-miR-6864-5p	hsa-miR-6864-5p	miRNA	0.333	0.333	0	0	0	0	0	0	0	1
hsa-miR-500a-3p	hsa-miR-500a-3p	miRNA	2	2	7.333	7.333	0	21	0	1	1	5	2.041738781	6.87E-04
hsa-miR-6721-5p	hsa-miR-6721-5p	miRNA	1.667	1.667	7.333	7.333	2	0	13	0	9	3	2.304773186	2.51E-04
hsa-miR-139-3p	hsa-miR-139-3p	miRNA	2869.667	3087.667	3102	3311	1380	1684	5846	6143	1776	1086	0.268019661	5.81E-38
hsa-miR-22-3p	hsa-miR-22-3p	miRNA	40856.333	55945.667	35278.667	44351.667	31953	42700	35348	51550	27788	39066	-0.167768407	4.25E-224
hsa-miR-3138	hsa-miR-3138	miRNA	0	0	3	3	0	0	9	0	0	0	4.337194664	0.001943358
hsa-miR-4662b	hsa-miR-4662b	miRNA	0.667	0.667	0	0	0	0	0	0	0	2
hsa-miR-6800-5p	hsa-miR-6800-5p	miRNA	0.667	0.667	0	0	0	0	0	0	0	2
hsa-miR-376b-5p	hsa-miR-376b-5p	miRNA	12.333	12.333	12.667	12.667	9	23	7	11	8	17	0.205743811	0.536565713
hsa-miR-6734-5p	hsa-miR-6734-5p	miRNA	20	20	15	15	26	32	9	26	4	8	-0.247767837	0.380966894
hsa-miR-4687-3p	hsa-miR-4687-3p	miRNA	0	0	3	3	0	7	0	0	2	0	4.337194664	0.001943358
hsa-miR-30b-3p	hsa-miR-30b-3p	miRNA	102.667	102.667	109.667	109.667	104	172	100	89	57	115	0.262426896	0.021629847
hsa-miR-4467	hsa-miR-4467	miRNA	1.667	1.667	1.667	1.667	4	5	0	0	0	1	0.167269663	0.85442517
hsa-miR-155-5p	hsa-miR-155-5p	miRNA	242	247	277	278.667	314	310	371	157	150	255	0.341299063	2.64E-06
hsa-miR-6770-3p	hsa-miR-6770-3p	miRNA	5.667	5.667	13.333	13.333	2	24	8	5	8	10	1.401734916	4.46E-04
hsa-miR-516a-5p	hsa-miR-516a-5p	miRNA	0	0	0.333	0.333	0	0	0	0	1	0
hsa-miR-6727-3p	hsa-miR-6727-3p	miRNA	0.667	0.667	2.667	2.667	0	8	0	0	0	2	2.167269663	0.033480896
hsa-miR-126-5p	hsa-miR-126-5p	miRNA	4360.667	4526.667	5740	6000	3963	3105	4314	2592	9801	6527	0.57378309	1.39E-271
hsa-miR-29b-3p	hsa-miR-29b-3p	miRNA	2.333	2.333	7.667	7.667	1	17	0	0	6	6	1.883476697	9.98E-04
hsa-let-7d-3p	hsa-let-7d-3p	miRNA	5626.333	6124	6487.667	6961.333	5880	1843	4484	646	13136	10353	0.352159038	2.74E-129
hsa-miR-6857-5p	hsa-miR-6857-5p	miRNA	1.333	1.333	0	0	0	0	0	0	0	4
hsa-miR-3190-5p	hsa-miR-3190-5p	miRNA	9	9	4.333	4.333	17	0	0	0	13	10	-0.887178121	0.059604834
hsa-miR-31-5p	hsa-miR-31-5p	miRNA	0.333	0.333	1.333	1.333	1	0	0	0	4	0	2.167269663	0.132710441
hsa-miR-541-3p	hsa-miR-541-3p	miRNA	1	1.333	0	0	2	0	0	0	0	1
hsa-miR-550a-5p	hsa-miR-550a-5p	miRNA	7.333	7.667	2.333	2.333	2	0	7	15	0	5	-1.548937371	0.006798688
hsa-miR-410-3p	hsa-miR-410-3p	miRNA	416	423.333	321.667	323.667	487	340	311	148	314	613	-0.220015634	3.22E-04
hsa-miR-3164	hsa-miR-3164	miRNA	1.333	1.333	3.333	3.333	0	0	4	0	6	4	1.489197758	0.066189019
hsa-miR-1843	hsa-miR-1843	miRNA	230.333	237	258	262	346	221	221	52	332	293	0.311949415	2.86E-05
hsa-miR-1268b	hsa-miR-1268b	miRNA	0.333	0.333	11	11	0	14	13	0	6	1	5.211663782	8.93E-10
hsa-miR-365b-3p	hsa-miR-365b-3p	miRNA	2.333	2.333	1.333	1.333	4	0	0	0	4	3	-0.640085259	0.470125463
hsa-miR-3605-5p	hsa-miR-3605-5p	miRNA	8	8.333	32.333	32.333	8	0	71	0	26	16	2.123326315	2.69E-13
hsa-miR-193b-5p	hsa-miR-193b-5p	miRNA	1	1	5.333	5.333	2	7	9	0	0	1	2.582307162	8.55E-04
hsa-miR-3166	hsa-miR-3166	miRNA	0.333	0.667	1.333	1.333	0	2	0	0	2	1	1.167269663	0.335555776
hsa-miR-1304-5p	hsa-miR-1304-5p	miRNA	3.333	3.333	8	8	5	4	17	1	3	4	1.430304069	0.005752366
hsa-miR-3683	hsa-miR-3683	miRNA	2	2	5.333	5.333	3	5	5	0	6	3	1.582307162	0.015115707
hsa-miR-6850-5p	hsa-miR-6850-5p	miRNA	2	2	0	0	5	0	0	0	0	1	-3.417692838	0.027354493
hsa-miR-29b-1-5p	hsa-miR-29b-1-5p	miRNA	0.333	0.333	0	0	0	0	0	0	0	1
hsa-miR-548e-3p	hsa-miR-548e-3p	miRNA	2.333	2.333	4	4	2	0	11	0	1	5	0.944877241	0.160556348
hsa-miR-624-5p	hsa-miR-624-5p	miRNA	46.333	47	74	74.333	30	78	61	6	83	103	0.82861821	6.21E-08
hsa-miR-548ap-5p	hsa-miR-548ap-5p	miRNA	14.333	14.667	24.333	24.667	20	31	11	1	31	22	0.91729141	6.76E-04
hsa-miR-1343-3p	hsa-miR-1343-3p	miRNA	4	4	10.333	10.333	7	5	0	0	26	5	1.536503472	9.33E-04
hsa-miR-7-5p	hsa-miR-7-5p	miRNA	6915	7476	3481.667	3744.333	11262	15	10422	9462	8	21	-0.830288032	0
hsa-miR-503-5p	hsa-miR-503-5p	miRNA	7.667	7.667	4.333	4.333	11	5	2	0	6	12	-0.655852575	0.180953408
hsa-miR-3136-5p	hsa-miR-3136-5p	miRNA	0	0	1	1	0	0	0	0	3	0
hsa-miR-1973	hsa-miR-1973	miRNA	0	0	0.667	0.667	0	0	2	0	0	0
hsa-let-7a-5p	hsa-let-7a-5p	miRNA	105981.333	268920	116315.333	281006.667	128740	122865	114848	72560	111233	116644	0.230696966	0
hsa-miR-4753-5p	hsa-miR-4753-5p	miRNA	0	0	0.333	0.333	0	1	0	0	0	0
hsa-miR-874-5p	hsa-miR-874-5p	miRNA	1	1	0	0	0	0	0	0	0	3
hsa-miR-6505-3p	hsa-miR-6505-3p	miRNA	0	0	0.333	0.333	0	0	0	0	1	0
hsa-miR-6746-3p	hsa-miR-6746-3p	miRNA	2.333	2.333	2.333	2.333	3	0	0	0	7	4	0.167269663	0.828137579
hsa-miR-5583-3p	hsa-miR-5583-3p	miRNA	0.667	0.667	0	0	0	0	0	0	0	2
hsa-miR-186-3p	hsa-miR-186-3p	miRNA	0	0	1.333	1.333	0	4	0	0	0	0
hsa-miR-3188	hsa-miR-3188	miRNA	7	7	22.667	23	0	6	46	11	16	10	1.883476697	1.20E-08
hsa-miR-548at-5p	hsa-miR-548at-5p	miRNA	19.667	20	18	18.333	28	15	18	0	21	31	0.041738781	0.876677054
hsa-miR-143-5p	hsa-miR-143-5p	miRNA	0	0	1.667	1.667	0	5	0	0	0	0	3.489197758	0.031380389
hsa-miR-4639-5p	hsa-miR-4639-5p	miRNA	1.667	1.667	0	0	5	0	0	0	0	0	-3.154658432	0.051671067
hsa-miR-1234-3p	hsa-miR-1234-3p	miRNA	0	0	1	1	0	0	3	0	0	0
hsa-miR-1180-3p	hsa-miR-1180-3p	miRNA	126.667	129.667	150	151	186	227	176	101	47	93	0.387010558	1.00E-04
hsa-miR-6511a-3p	hsa-miR-6511a-3p	miRNA	12	12.333	15.667	16	20	23	18	0	6	16	0.542778798	0.083905808
hsa-miR-3130-3p	hsa-miR-3130-3p	miRNA	4.333	4.333	1	1	6	0	0	0	3	7	-1.948207555	0.01692963
hsa-miR-454-3p	hsa-miR-454-3p	miRNA	239.667	241.667	234	235.333	268	127	119	0	456	451	0.128956851	0.090635418
hsa-miR-142-5p	hsa-miR-142-5p	miRNA	274.667	277.667	192	192.333	96	52	71	320	453	408	-0.362475514	2.84E-06
hsa-miR-6803-3p	hsa-miR-6803-3p	miRNA	9.667	9.667	16	16.333	11	21	0	0	27	18	0.923998512	0.005387773
hsa-miR-199b-3p	hsa-miR-199b-3p	miRNA	37512.667	51655.667	38654.333	49310.333	38270	48608	27657	12691	39698	61577	0.100233046	2.54E-82
hsa-miR-3176	hsa-miR-3176	miRNA	5	5	1.667	1.667	7	0	5	7	0	1	-1.417692838	0.040702125
hsa-miR-223-3p	hsa-miR-223-3p	miRNA	62472.667	107244	49321.667	67842.333	54330	42660	47247	35413	58058	97675	-0.493369577	0
hsa-miR-6824-3p	hsa-miR-6824-3p	miRNA	1.333	1.333	0	0	0	0	0	0	0	4
hsa-miR-4748	hsa-miR-4748	miRNA	1.667	1.667	1	1	5	0	0	0	3	0	-0.569695931	0.582338107
hsa-miR-6783-3p	hsa-miR-6783-3p	miRNA	0	0	1	1	0	0	0	0	3	0
hsa-miR-377-3p	hsa-miR-377-3p	miRNA	23	23.667	26.333	26.333	19	42	9	31	28	19	0.321303291	0.172569266
hsa-miR-3173-5p	hsa-miR-3173-5p	miRNA	28.667	29.333	38.667	39	37	29	21	0	66	49	0.578202764	0.00427546
hsa-let-7g-5p	hsa-let-7g-5p	miRNA	115238	308367.667	129240	368609	124390	136817	131053	91983	119850	129341	0.424709457	0
hsa-miR-197-5p	hsa-miR-197-5p	miRNA	0	0	2.333	2.333	0	0	7	0	0	0	3.974624585	0.007658025
hsa-miR-34b-3p	hsa-miR-34b-3p	miRNA	1	1	0	0	3	0	0	0	0	0
hsa-miR-664a-3p	hsa-miR-664a-3p	miRNA	611.333	619	359.333	361	478	158	122	9	798	1347	-0.61067091	1.62E-29
hsa-miR-3944-5p	hsa-miR-3944-5p	miRNA	3.667	3.667	7.333	7.333	3	0	18	0	4	8	1.167269663	0.023920889
hsa-miR-6789-3p	hsa-miR-6789-3p	miRNA	0.667	0.667	2	2	0	0	0	0	6	2	1.752232163	0.10964586
hsa-miR-769-5p	hsa-miR-769-5p	miRNA	77.667	79.333	71.667	72.333	35	131	38	141	46	57	0.034003132	0.801464176
hsa-miR-7845-5p	hsa-miR-7845-5p	miRNA	1.333	1.333	10	10	0	0	30	0	0	4	3.074160258	6.00E-07
hsa-miR-497-5p	hsa-miR-497-5p	miRNA	46	46.333	31.333	31.333	3	18	51	87	25	48	-0.397082558	0.037293281
hsa-miR-382-5p	hsa-miR-382-5p	miRNA	2125.667	2186.333	2293.667	2352	2273	3282	2399	2972	1200	1132	0.272644349	2.64E-28
hsa-miR-3613-3p	hsa-miR-3613-3p	miRNA	0	0	0.667	0.667	0	2	0	0	0	0
hsa-miR-4731-5p	hsa-miR-4731-5p	miRNA	0	0	2	2	0	4	0	0	2	0	3.752232163	0.01541853
hsa-miR-579-3p	hsa-miR-579-3p	miRNA	1.333	1.333	1	1	1	0	0	0	3	3	-0.247767837	0.821036625
hsa-miR-4775	hsa-miR-4775	miRNA	3.333	3.333	1.667	1.667	2	0	0	0	5	8	-0.832730337	0.277376888
hsa-let-7g-3p	hsa-let-7g-3p	miRNA	1.667	1.667	7.667	7.667	2	13	0	0	10	3	2.368903524	1.42E-04
hsa-miR-548a-5p	hsa-miR-548a-5p	miRNA	0	0	0.333	0.333	0	0	0	0	1	0
hsa-miR-4433b-3p	hsa-miR-4433b-3p	miRNA	606.333	612	714.667	720.333	1030	1053	548	323	543	466	0.402402676	1.25E-18
hsa-miR-10399-3p	hsa-miR-10399-3p	miRNA	15.667	15.667	11	11.333	6	15	9	21	9	20	-0.299856348	0.352370916
hsa-miR-3150a-3p	hsa-miR-3150a-3p	miRNA	35	35	42.667	42.667	10	50	68	84	10	11	0.453024145	0.016722507
hsa-miR-6878-5p	hsa-miR-6878-5p	miRNA	0	0	0.667	0.667	0	0	0	0	2	0
hsa-let-7b-3p	hsa-let-7b-3p	miRNA	0	0	0.333	0.333	0	0	0	0	1	0
hsa-miR-379-5p	hsa-miR-379-5p	miRNA	6816	7183.333	7377.667	7731.333	9636	7705	8937	4696	5491	6116	0.27333344	1.60E-89
hsa-miR-1255b-5p	hsa-miR-1255b-5p	miRNA	2.667	2.667	10.667	10.667	5	18	12	0	2	3	2.167269663	2.11E-05
hsa-miR-6812-3p	hsa-miR-6812-3p	miRNA	1	1	0.667	0.667	3	0	0	0	2	0	-0.417692838	0.748453948
hsa-miR-134-3p	hsa-miR-134-3p	miRNA	7	7	3	3	4	4	1	15	4	2	-1.055122759	0.05497383
hsa-miR-331-3p	hsa-miR-331-3p	miRNA	33	33.333	43	43.333	35	42	60	38	27	26	0.545781286	0.004252704
hsa-miR-4796-5p	hsa-miR-4796-5p	miRNA	0	0	0.667	0.667	0	0	0	0	2	0
hsa-miR-185-3p	hsa-miR-185-3p	miRNA	0.667	0.667	0	0	2	0	0	0	0	0
hsa-miR-187-3p	hsa-miR-187-3p	miRNA	24.667	25.667	26.333	26.667	19	41	30	51	8	4	0.222411217	0.33376492
hsa-miR-6501-3p	hsa-miR-6501-3p	miRNA	1.333	1.667	1	1	0	0	0	0	3	4	-0.569695931	0.582338107
hsa-miR-874-3p	hsa-miR-874-3p	miRNA	82	84.333	84	84.333	49	157	71	185	24	12	0.167269663	0.191846428
hsa-miR-130a-5p	hsa-miR-130a-5p	miRNA	0	0	4	4	0	8	4	0	0	0	4.752232163	2.64E-04
hsa-miR-1260b	hsa-miR-1260b	miRNA	87	89.667	93	95.667	121	106	74	48	99	92	0.260714227	0.033021039
hsa-miR-943	hsa-miR-943	miRNA	0.667	0.667	0.333	0.333	1	0	0	0	1	1	-0.832730337	0.627125208
hsa-miR-107	hsa-miR-107	miRNA	16.667	16.667	31.667	31.667	21	81	0	1	14	28	1.093269081	8.50E-06
hsa-miR-6865-3p	hsa-miR-6865-3p	miRNA	0	0	0.333	0.333	0	0	0	0	1	0
hsa-miR-6772-3p	hsa-miR-6772-3p	miRNA	34.333	34.333	14	14	0	6	2	98	34	5	-1.126913442	7.35E-06
hsa-miR-1233-3p	hsa-miR-1233-3p	miRNA	2.667	2.667	3.333	3.333	1	1	1	4	8	3	0.489197758	0.472953226
hsa-miR-200a-5p	hsa-miR-200a-5p	miRNA	1.667	1.667	3.333	3.333	0	7	0	0	3	5	1.167269663	0.127856085
hsa-miR-4688	hsa-miR-4688	miRNA	4.667	4.667	0	0	14	0	0	0	0	0	-4.640085259	2.14E-04
hsa-miR-222-3p	hsa-miR-222-3p	miRNA	13471.333	15835.667	11476.333	12653	10206	3770	11315	2776	19344	27432	-0.156428457	1.84E-56
hsa-miR-6866-5p	hsa-miR-6866-5p	miRNA	0.333	0.333	0	0	0	0	0	0	0	1
hsa-miR-1-3p	hsa-miR-1-3p	miRNA	2226.333	2275.333	947.333	957.333	2008	674	733	228	1435	4443	-1.081715003	3.72E-273
hsa-miR-629-3p	hsa-miR-629-3p	miRNA	18.667	18.667	15.667	16	25	7	32	24	8	7	-0.055122759	0.845628471
hsa-miR-6786-5p	hsa-miR-6786-5p	miRNA	0	0	0.667	0.667	0	2	0	0	0	0
hsa-miR-10a-3p	hsa-miR-10a-3p	miRNA	0.333	0.333	0	0	0	0	0	0	0	1
hsa-miR-4473	hsa-miR-4473	miRNA	5.667	5.667	3.667	3.667	5	8	0	0	3	12	-0.46076156	0.40325704
hsa-miR-891a-5p	hsa-miR-891a-5p	miRNA	4	4	4	4	12	6	0	0	6	0	0.167269663	0.776227514
hsa-miR-106b-5p	hsa-miR-106b-5p	miRNA	69	69.667	58.667	58.667	39	30	21	0	125	168	-0.080657851	0.583727888
hsa-miR-7852-3p	hsa-miR-7852-3p	miRNA	0	0	1.333	1.333	0	2	0	0	2	0
hsa-miR-221-3p	hsa-miR-221-3p	miRNA	12293	13725.667	13056.333	14428	9829	19014	12933	14763	7222	12287	0.239264767	8.16E-129
hsa-miR-6780b-3p	hsa-miR-6780b-3p	miRNA	0.333	0.333	0.667	0.667	1	0	0	0	2	0	1.167269663	0.495914409
hsa-miR-4423-5p	hsa-miR-4423-5p	miRNA	0	0	2	2	0	0	6	0	0	0	3.752232163	0.01541853
hsa-miR-125b-5p	hsa-miR-125b-5p	miRNA	24.333	24.667	29	29.667	35	37	48	19	2	19	0.433549728	0.055379112
hsa-miR-1249-3p	hsa-miR-1249-3p	miRNA	8.667	8.667	7.333	7.333	15	6	5	0	11	11	-0.073738437	0.859589962
hsa-miR-149-5p	hsa-miR-149-5p	miRNA	9	9.333	15.333	15.667	19	31	7	2	8	6	0.914503592	0.00689371
hsa-miR-23b-5p	hsa-miR-23b-5p	miRNA	136.333	141.333	202	207	147	144	305	153	157	109	0.717798666	1.51E-15
hsa-miR-629-5p	hsa-miR-629-5p	miRNA	30.333	30.333	18	18	17	15	21	61	18	13	-0.585637475	0.016160554
hsa-miR-4787-3p	hsa-miR-4787-3p	miRNA	3.333	3.333	3.667	3.667	1	0	8	9	3	0	0.304773186	0.628263386
hsa-miR-204-5p	hsa-miR-204-5p	miRNA	295.333	303.667	490.333	506.667	394	297	1013	288	161	204	0.905818027	1.83E-52
hsa-miR-493-5p	hsa-miR-493-5p	miRNA	903.667	922.333	777.667	786	1179	597	1000	308	736	1224	-0.063489263	0.115452043
hsa-miR-409-3p	hsa-miR-409-3p	miRNA	4047.667	4254	4372.333	4539.667	5513	4952	4963	2995	3202	3635	0.261035998	5.70E-49
hsa-miR-561-5p	hsa-miR-561-5p	miRNA	2	2	0	0	6	0	0	0	0	0	-3.417692838	0.027354493
hsa-miR-30e-3p	hsa-miR-30e-3p	miRNA	722.333	730.667	830.667	838	525	874	790	639	828	1003	0.365006514	4.11E-18
hsa-miR-4681	hsa-miR-4681	miRNA	0.333	0.333	0	0	0	0	0	0	0	1
hsa-miR-616-3p	hsa-miR-616-3p	miRNA	5.333	5.333	6.667	6.667	10	0	20	0	0	6	0.489197758	0.310126681
hsa-miR-30c-2-3p	hsa-miR-30c-2-3p	miRNA	1	1	3.667	4	2	1	6	0	4	1	2.167269663	0.009210599
hsa-miR-30c-1-3p	hsa-miR-30c-1-3p	miRNA	65.333	65.667	37	37.333	78	54	20	37	37	81	-0.647427235	1.09E-04
hsa-miR-1538	hsa-miR-1538	miRNA	3	3	2	2	6	0	3	0	3	3	-0.417692838	0.578599379
hsa-miR-4516	hsa-miR-4516	miRNA	3	3.333	0.333	0.333	8	0	0	1	1	0	-3.154658432	0.005925649
hsa-miR-3680-3p	hsa-miR-3680-3p	miRNA	0.333	0.333	0	0	0	0	0	0	0	1
hsa-miR-1273c	hsa-miR-1273c	miRNA	16	16	8.667	9	8	12	6	35	8	5	-0.662805336	0.051080784
hsa-miR-29c-5p	hsa-miR-29c-5p	miRNA	414.667	423.333	417	422.667	248	527	371	623	353	373	0.164995911	0.003934845
hsa-miR-3154	hsa-miR-3154	miRNA	1.333	1.333	0	0	4	0	0	0	0	0
hsa-miR-1277-3p	hsa-miR-1277-3p	miRNA	49	50.333	31.333	31.667	7	8	11	8	75	132	-0.501279468	0.00712143
hsa-miR-6869-5p	hsa-miR-6869-5p	miRNA	1	1	1	1	0	0	0	0	3	3	0.167269663	0.886985793
hsa-miR-6796-3p	hsa-miR-6796-3p	miRNA	0	0	0.667	0.667	0	0	0	0	2	0
hsa-miR-4795-3p	hsa-miR-4795-3p	miRNA	0.667	0.667	0	0	0	0	0	0	0	2
hsa-miR-6833-3p	hsa-miR-6833-3p	miRNA	0	0	0.333	0.333	0	0	0	0	1	0
hsa-miR-320a-5p	hsa-miR-320a-5p	miRNA	0	0	0.667	0.667	0	2	0	0	0	0
hsa-miR-374b-5p	hsa-miR-374b-5p	miRNA	1046.333	1072.333	773.667	783.667	1109	590	524	0	1207	2030	-0.285171734	2.19E-13
hsa-miR-3620-3p	hsa-miR-3620-3p	miRNA	2.333	2.333	1.667	1.667	1	3	1	1	1	5	-0.318157164	0.704237344
hsa-miR-519b-5p	hsa-miR-519b-5p	miRNA	0	0	0.333	0.333	0	0	0	0	1	0
hsa-miR-6847-5p	hsa-miR-6847-5p	miRNA	12	12	2.667	2.667	4	7	0	30	1	2	-2.002655339	5.19E-05
hsa-miR-495-3p	hsa-miR-495-3p	miRNA	67.333	68	136.333	137.333	121	130	65	19	214	62	1.181344848	5.78E-23
hsa-miR-889-3p	hsa-miR-889-3p	miRNA	86	87.333	108.333	108.333	89	112	95	33	118	136	0.478142569	6.16E-05
hsa-miR-1185-5p	hsa-miR-1185-5p	miRNA	9	10.333	4	4	12	3	2	0	7	15	-1.201964147	0.009613752
hsa-miR-188-5p	hsa-miR-188-5p	miRNA	0	0	2.333	2.333	0	0	0	0	7	0	3.974624585	0.007658025
hsa-miR-363-3p	hsa-miR-363-3p	miRNA	530.667	535.667	519.333	522.333	439	543	627	436	388	717	0.130904914	0.010523604
hsa-miR-212-5p	hsa-miR-212-5p	miRNA	1.667	2	4.667	4.667	4	0	8	0	6	1	1.389662084	0.039042687
hsa-miR-4746-5p	hsa-miR-4746-5p	miRNA	0.667	0.667	0	0	2	0	0	0	0	0
hsa-miR-5010-3p	hsa-miR-5010-3p	miRNA	33.333	34.667	27.667	29.667	39	16	19	5	48	56	-0.057436624	0.782273553
hsa-miR-3940-3p	hsa-miR-3940-3p	miRNA	1.333	1.333	0.333	0.333	3	0	0	0	1	1	-1.832730337	0.203579591
hsa-miR-3115	hsa-miR-3115	miRNA	22	22	17.333	17.333	32	24	21	15	7	19	-0.176684738	0.507087812
hsa-miR-199b-5p	hsa-miR-199b-5p	miRNA	22.667	23	20.667	20.667	19	20	19	31	23	18	0.012941516	0.959053136
hsa-miR-20b-5p	hsa-miR-20b-5p	miRNA	120	122.667	150	151.333	127	142	168	29	140	204	0.470256194	3.10E-06
hsa-miR-6879-3p	hsa-miR-6879-3p	miRNA	0	0	0.667	0.667	0	2	0	0	0	0
hsa-miR-92a-1-5p	hsa-miR-92a-1-5p	miRNA	28.333	29	22.333	22.333	25	25	16	47	26	13	-0.209584643	0.369011626
hsa-miR-6763-3p	hsa-miR-6763-3p	miRNA	0	0	0.333	0.333	0	0	0	0	1	0
hsa-miR-548h-3p	hsa-miR-548h-3p	miRNA	0.333	0.333	0	0	0	0	0	0	0	1
hsa-miR-6853-3p	hsa-miR-6853-3p	miRNA	1	1	0	0	2	0	0	1	0	0
hsa-miR-135b-5p	hsa-miR-135b-5p	miRNA	0	0	0.333	0.333	0	0	1	0	0	0
hsa-miR-6767-5p	hsa-miR-6767-5p	miRNA	1	1	5	5	3	0	13	0	2	0	2.489197758	0.001563925
hsa-miR-212-3p	hsa-miR-212-3p	miRNA	46.333	47.667	49.333	50	66	33	42	17	73	56	0.236217016	0.16082171
hsa-miR-214-3p	hsa-miR-214-3p	miRNA	0	0	0.667	0.667	0	0	0	0	2	0
hsa-miR-93-3p	hsa-miR-93-3p	miRNA	85.333	88.667	76	76.333	87	75	55	42	98	127	-0.048808985	0.706807738
hsa-miR-1197	hsa-miR-1197	miRNA	6.333	6.333	4	4	6	6	0	0	6	13	-0.49569535	0.344723214
hsa-miR-7151-3p	hsa-miR-7151-3p	miRNA	2.333	2.333	0	0	7	0	0	0	0	0	-3.640085259	0.01459294
hsa-miR-323a-3p	hsa-miR-323a-3p	miRNA	518.667	523.333	389.333	391.667	756	228	301	45	639	755	-0.25083414	5.76E-06
hsa-miR-4662a-5p	hsa-miR-4662a-5p	miRNA	40	40.667	33	33.667	43	33	11	3	55	74	-0.105256192	0.586445229
hsa-miR-4692	hsa-miR-4692	miRNA	0.333	0.333	0	0	0	0	0	0	0	1
hsa-miR-28-5p	hsa-miR-28-5p	miRNA	2690	2798.333	2696.333	2781.667	2730	2367	1548	1966	4174	3374	0.158651387	1.07E-12
hsa-miR-103b	hsa-miR-103b	miRNA	2685.333	2770.333	1934	1976	2530	3998	1762	1228	42	4298	-0.320206966	1.44E-39
hsa-miR-671-3p	hsa-miR-671-3p	miRNA	69	70.333	80.333	81.667	103	51	77	15	113	89	0.382808413	0.004632537
hsa-miR-2277-5p	hsa-miR-2277-5p	miRNA	1	1	1	1	2	0	0	0	3	1	0.167269663	0.886985793
hsa-miR-641	hsa-miR-641	miRNA	19.667	19.667	25.667	26.667	18	27	34	16	16	25	0.606554708	0.013654809
hsa-miR-4498	hsa-miR-4498	miRNA	0	0	1.333	1.333	0	0	0	0	4	0
hsa-miR-1285-3p	hsa-miR-1285-3p	miRNA	0.333	0.333	2	2	0	6	0	0	0	1	2.752232163	0.034601371
hsa-miR-1193	hsa-miR-1193	miRNA	0.667	0.667	0	0	2	0	0	0	0	0
hsa-miR-103a-3p	hsa-miR-103a-3p	miRNA	135.667	137.667	921.333	938.333	7	172	8	40	2584	360	2.936190898	0
hsa-miR-30a-3p	hsa-miR-30a-3p	miRNA	62	62.667	62	62.333	46	99	56	67	31	73	0.159575271	0.283777403
hsa-let-7i-3p	hsa-let-7i-3p	miRNA	23	23	30	30	22	14	15	14	61	33	0.550598302	0.016501084
hsa-miR-6733-3p	hsa-miR-6733-3p	miRNA	0.333	0.667	0	0	0	0	0	0	0	1
hsa-miR-22-5p	hsa-miR-22-5p	miRNA	217	218.667	228	229	230	348	192	110	144	311	0.233883947	0.002952035
hsa-miR-3190-3p	hsa-miR-3190-3p	miRNA	2.667	2.667	1.333	1.333	7	0	0	0	4	1	-0.832730337	0.33127231
hsa-miR-6895-5p	hsa-miR-6895-5p	miRNA	0	0	0.667	0.667	0	0	0	0	2	0
hsa-miR-501-3p	hsa-miR-501-3p	miRNA	34	35.333	59.667	60.667	64	76	76	0	27	38	0.947143848	4.36E-08
hsa-miR-4734	hsa-miR-4734	miRNA	0.333	0.333	0	0	1	0	0	0	0	0
hsa-miR-652-3p	hsa-miR-652-3p	miRNA	16187.667	18142.333	14140.333	15514.667	11984	18268	16087	19411	8066	17168	-0.058457653	1.17E-10
hsa-miR-2116-3p	hsa-miR-2116-3p	miRNA	1.667	2	0	0	3	0	0	0	0	2	-3.417692838	0.027354493
hsa-miR-181d-5p	hsa-miR-181d-5p	miRNA	445.667	462.333	403.667	414.333	507	445	273	335	493	495	0.009128171	0.871100676
hsa-miR-4999-5p	hsa-miR-4999-5p	miRNA	0	0	1.667	1.667	0	0	0	0	5	0	3.489197758	0.031380389
hsa-miR-183-5p	hsa-miR-183-5p	miRNA	33.667	34.667	26	27	46	3	62	11	13	44	-0.193320053	0.363605388
hsa-miR-4443	hsa-miR-4443	miRNA	1	1	1.667	1.667	1	0	5	0	0	2	0.904235257	0.38270121
hsa-miR-371b-5p	hsa-miR-371b-5p	miRNA	0	0	0.333	0.333	0	0	0	0	1	0
hsa-miR-20b-3p	hsa-miR-20b-3p	miRNA	0	0	2.667	2.667	0	3	5	0	0	0	4.167269663	0.003840696
hsa-miR-544a	hsa-miR-544a	miRNA	0	0	1	1	0	0	0	0	3	0
hsa-miR-6804-5p	hsa-miR-6804-5p	miRNA	5	5	6.333	6.333	13	9	7	0	3	2	0.508306581	0.305598789
hsa-miR-3651	hsa-miR-3651	miRNA	1	1	0	0	3	0	0	0	0	0
hsa-miR-6878-3p	hsa-miR-6878-3p	miRNA	0.667	0.667	0	0	0	0	0	0	0	2
hsa-miR-3139	hsa-miR-3139	miRNA	2	2	1.667	1.667	0	0	0	0	5	6	-0.095764743	0.912455867
hsa-miR-655-3p	hsa-miR-655-3p	miRNA	0	0	1	1	0	0	0	0	3	0
hsa-miR-491-5p	hsa-miR-491-5p	miRNA	54.333	55.333	59.667	60	33	69	63	84	47	46	0.284083328	0.066924513
hsa-miR-4446-5p	hsa-miR-4446-5p	miRNA	0	0	2.333	2.333	0	7	0	0	0	0	3.974624585	0.007658025
hsa-miR-451a	hsa-miR-451a	miRNA	67098.667	138021.667	55841	83919.333	36410	62818	69820	44605	34885	120281	-0.550549974	0
hsa-miR-4685-3p	hsa-miR-4685-3p	miRNA	21.667	21.667	13.333	13.667	23	19	3	10	18	32	-0.497546146	0.079497032
hsa-miR-548ag	hsa-miR-548ag	miRNA	0.333	0.333	0	0	0	0	0	0	0	1
hsa-miR-126-3p	hsa-miR-126-3p	miRNA	91494	202437.667	89401	168028.667	82869	89945	86429	66193	91829	125420	-0.101500702	0
hsa-miR-511-3p	hsa-miR-511-3p	miRNA	0	0	0.333	0.333	0	0	0	0	1	0
hsa-miR-4286	hsa-miR-4286	miRNA	100.333	103	163.667	164.667	92	110	65	159	316	50	0.844173866	2.72E-16
hsa-miR-3194-3p	hsa-miR-3194-3p	miRNA	0	0	2.333	2.333	0	7	0	0	0	0	3.974624585	0.007658025
hsa-miR-627-3p	hsa-miR-627-3p	miRNA	0	0	0.333	0.333	0	0	0	0	1	0
hsa-miR-6887-3p	hsa-miR-6887-3p	miRNA	0	0	0.333	0.333	0	1	0	0	0	0
