# Supplementary material for: Circulating miR-320b Contributes to CD4+ T-Cell Proliferation in Systemic Lupus Erythematosus via MAP3K1
Source: J Immunol Res. 2023 Oct 26;2023:6696967. doi: 10.1155/2023/6696967 (PMC10622187; doi:10.1155/2023/6696967)
Supplement: Supplementary 3 — The differentially expressed miRNAs between pre- and post-MSCT group. [file 6696967.f3.txt]

	names	logFC	P.Value	change
1	hsa-miR-4433b-5p	1.023656422	6.22E-85	up
2	hsa-miR-6741-3p	1.707838044	2.87E-07	up
3	hsa-miR-548ad-5p	-1.454218714	0.000658	down
4	hsa-miR-548ae-5p	-1.454218714	0.000658	down
5	hsa-miR-6754-3p	4.867709381	0.000137	up
6	hsa-miR-4485-5p	-4.154658432	0.002307035	down
7	hsa-miR-3529-3p	1.572221709	0	up
8	hsa-miR-4786-5p	-4.292161956	0.001262598	down
9	hsa-miR-6724-5p	1.24255779	0.000102	up
10	hsa-miR-6780a-5p	3.489197758	0.002336939	up
11	hsa-miR-2115-3p	3.974624585	0.007658025	up
12	hsa-miR-939-5p	-5.587617839	1.49E-07	down
13	hsa-miR-122-5p	1.814313475	0	up
14	hsa-miR-6502-5p	1.314111051	0.003258343	up
15	hsa-miR-148a-3p	1.236494118	4.59E-36	up
16	hsa-miR-584-3p	-1.363245054	0.008909926	down
17	hsa-miR-4655-5p	3.167269663	0.008976188	up
18	hsa-miR-3180	2.015266569	0.002327829	up
19	hsa-miR-432-3p	1.051172598	3.24E-09	up
20	hsa-miR-3157-3p	-1.520786331	0.002713145	down
21	hsa-miR-708-5p	4.167269663	0.003840696	up
22	hsa-miR-5698	3.974624585	0.007658025	up
23	hsa-miR-2277-3p	-1.006759737	0.000157	down
24	hsa-miR-551b-3p	4.167269663	0.003840696	up
25	hsa-miR-3127-5p	2.389662084	0.002843457	up
26	hsa-miR-5001-3p	1.752232163	1.18E-05	up
27	hsa-miR-4772-3p	-2.771329793	8.92E-05	down
28	hsa-miR-4676-3p	-4.640085259	0.000214	down
29	hsa-miR-6832-5p	4.867709381	0.000137	up
30	hsa-miR-550a-3-5p	3.974624585	0.000162	up
31	hsa-miR-1276	4.811125853	1.31E-07	up
32	hsa-miR-5697	-3.920193179	9.43E-05	down
33	hsa-miR-196a-5p	1.779300407	2.58E-27	up
34	hsa-miR-218-5p	1.619781867	8.40E-06	up
35	hsa-miR-4656	3.974624585	0.007658025	up
36	hsa-miR-193b-3p	2.237658991	0.000442	up
37	hsa-miR-378c	5.167269663	2.02E-05	up
38	hsa-miR-9-5p	-1.560650792	3.61E-05	down
39	hsa-miR-4726-5p	-2.763467675	1.87E-10	down
40	hsa-miR-8485	3.974624585	0.007658025	up
41	hsa-miR-29b-2-5p	2.074160258	0.00462936	up
42	hsa-miR-6763-5p	3.489197758	0.002336939	up
43	hsa-miR-6809-5p	5.415197176	3.11E-06	up
44	hsa-miR-4676-5p	-1.510802242	0.001721379	down
45	hsa-miR-548aw	4.167269663	0.003840696	up
46	hsa-miR-503-3p	3.690831619	2.42E-06	up
47	hsa-miR-7849-3p	-1.312199709	2.00E-09	down
48	hsa-miR-4470	2.093269081	0.001347055	up
49	hsa-miR-4479	2.536503472	4.33E-06	up
50	hsa-miR-5189-3p	1.029766139	2.64E-07	up
51	hsa-miR-550a-3p	3.922157165	1.83E-07	up
52	hsa-miR-4660	2.167269663	0.002638412	up
53	hsa-miR-11401	-3.640085259	0.000552	down
54	hsa-miR-6895-3p	5.337194664	5.77E-06	up
55	hsa-miR-4440	4.167269663	0.003840696	up
56	hsa-miR-3928-3p	3.974624585	9.63E-08	up
57	hsa-miR-3529-5p	-4.739620933	0.000119	down
58	hsa-miR-4641	3.489197758	0.002336939	up
59	hsa-miR-760	1.41343025	1.68E-08	up
60	hsa-miR-3614-5p	-2.533170055	0.00501655	down
61	hsa-miR-885-5p	2.182866518	3.29E-13	up
62	hsa-miR-3124-5p	1.381048954	1.30E-12	up
63	hsa-miR-3127-3p	2.015266569	0.002327829	up
64	hsa-miR-5004-3p	1.206798027	0.002635683	up
65	hsa-miR-3177-5p	1.883476697	0.000998	up
66	hsa-miR-301b-3p	1.469832433	7.45E-07	up
67	hsa-miR-4508	3.974624585	0.007658025	up
68	hsa-miR-4525	4.626701281	0.00051	up
69	hsa-miR-125b-1-3p	-5.080657851	1.21E-05	down
70	hsa-miR-361-3p	-1.191811431	0.000388	down
71	hsa-miR-548t-5p	1.697784379	0.001124654	up
72	hsa-miR-2355-3p	1.074160258	0.002522317	up
73	hsa-miR-26a-2-3p	1.36520904	0.000678	up
74	hsa-miR-3605-3p	1.044121432	9.79E-06	up
75	hsa-miR-500a-5p	3.974624585	0.007658025	up
76	hsa-miR-5586-5p	-3.154658432	0.005925649	down
77	hsa-miR-483-5p	1.526124327	7.16E-23	up
78	hsa-miR-2278	-1.400414847	1.84E-06	down
79	hsa-miR-4654	2.304773186	2.24E-07	up
80	hsa-miR-374c-3p	1.020428274	2.19E-08	up
81	hsa-miR-1225-5p	-6.614090051	1.09E-13	down
82	hsa-miR-210-5p	1.752232163	0.005589939	up
83	hsa-miR-627-5p	3.28274688	1.70E-06	up
84	hsa-miR-509-3p	2.904235257	2.05E-08	up
85	hsa-miR-4708-3p	2.167269663	0.002638412	up
86	hsa-miR-320b	-1.030176401	4.70E-27	down
87	hsa-miR-6515-5p	3.559587086	8.78E-06	up
88	hsa-miR-4645-3p	4.626701281	8.86E-07	up
89	hsa-miR-3191-5p	3.415197176	3.19E-05	up
90	hsa-miR-6805-5p	3.974624585	0.000162	up
91	hsa-miR-3065-3p	3.337194664	0.004576552	up
92	hsa-miR-10399-5p	3.974624585	0.000162	up
93	hsa-miR-410-5p	2.093269081	0.001347055	up
94	hsa-miR-501-5p	3.440288157	2.55E-07	up
95	hsa-miR-6793-5p	-1.832730337	0.004469384	down
96	hsa-miR-6741-5p	1.597257503	1.71E-09	up
97	hsa-miR-301a-5p	3.974624585	0.000162	up
98	hsa-miR-96-5p	4.489197758	0.000991	up
99	hsa-miR-195-5p	1.867709381	0.000503	up
100	hsa-miR-6726-5p	5.167269663	2.02E-05	up
101	hsa-miR-509-3-5p	4.074160258	8.39E-05	up
102	hsa-miR-889-5p	3.041738781	1.80E-09	up
103	hsa-miR-3191-3p	1.641200851	1.15E-18	up
104	hsa-miR-6820-5p	-4.22504776	9.13E-06	down
105	hsa-miR-1303	-2.22504776	0.000952	down
106	hsa-miR-9-3p	-1.164573901	0.000107	down
107	hsa-miR-500a-3p	2.041738781	0.000687	up
108	hsa-miR-6721-5p	2.304773186	0.000251	up
109	hsa-miR-3138	4.337194664	0.001943358	up
110	hsa-miR-4687-3p	4.337194664	0.001943358	up
111	hsa-miR-6770-3p	1.401734916	0.000446	up
112	hsa-miR-29b-3p	1.883476697	0.000998	up
113	hsa-miR-550a-5p	-1.548937371	0.006798688	down
114	hsa-miR-1268b	5.211663782	8.93E-10	up
115	hsa-miR-3605-5p	2.123326315	2.69E-13	up
116	hsa-miR-193b-5p	2.582307162	0.000855	up
117	hsa-miR-1304-5p	1.430304069	0.005752366	up
118	hsa-miR-1343-3p	1.536503472	0.000933	up
119	hsa-miR-3188	1.883476697	1.20E-08	up
120	hsa-miR-197-5p	3.974624585	0.007658025	up
121	hsa-miR-7845-5p	3.074160258	6.00E-07	up
122	hsa-let-7g-3p	2.368903524	0.000142	up
123	hsa-miR-1255b-5p	2.167269663	2.11E-05	up
124	hsa-miR-130a-5p	4.752232163	0.000264	up
125	hsa-miR-107	1.093269081	8.50E-06	up
126	hsa-miR-6772-3p	-1.126913442	7.35E-06	down
127	hsa-miR-4688	-4.640085259	0.000214	down
128	hsa-miR-1-3p	-1.081715003	3.72E-273	down
129	hsa-miR-30c-2-3p	2.167269663	0.009210599	up
130	hsa-miR-4516	-3.154658432	0.005925649	down
131	hsa-miR-6847-5p	-2.002655339	5.19E-05	down
132	hsa-miR-495-3p	1.181344848	5.78E-23	up
133	hsa-miR-1185-5p	-1.201964147	0.009613752	down
134	hsa-miR-188-5p	3.974624585	0.007658025	up
135	hsa-miR-6767-5p	2.489197758	0.001563925	up
136	hsa-miR-103a-3p	2.936190898	0	up
137	hsa-miR-20b-3p	4.167269663	0.003840696	up
138	hsa-miR-4446-5p	3.974624585	0.007658025	up
139	hsa-miR-3194-3p	3.974624585	0.007658025	up
